# Supplementary material for: Design of simple-structured conjugated polymers for organic solar cells by machine learning-assisted structural modification and experimental validation
Source: Royal Society of Chemistry journal article supplement (doi:10.1039/d5dd00418g), 2025-01-01
Supplement: d5dd00418g1.pdf [file d5dd00418g1.pdf]

## *Electronic Supplementary Information (ESI)*

# **Design of Simple-Structured Conjugated Polymers for Organic Solar Cells by Machine Learning- Assisted Structural Modification and Experimental Validation**

*Shogo Tadokoro<sup>1</sup>, Ryosuke Kamimura<sup>1</sup>, Fumitaka Ishiwari<sup>1,2,3,4</sup>, Akinori Saeki<sup>1,2\*</sup>*

<sup>1</sup> Department of Applied Chemistry, Graduate School of Engineering, Osaka University, 2-1 Yamadaoka, Suita, Osaka 565-0871, Japan.

<sup>2</sup> Innovative Catalysis Science Division, Institute for Open and Transdisciplinary Research Initiatives (ICS-OTRI), Osaka University, 1-1 Yamadaoka, Suita, Osaka 565-0871, Japan.<sup>3</sup>

<sup>3</sup> PRESTO, Japan Science and Technology Agency (JST), Kawaguchi, Saitama 332-0012, Japan.

<sup>4</sup> Graduate School of Urban Environmental Sciences, Tokyo Metropolitan University, 1-1 Minamiosawa, Hachioji, Tokyo 192-0297, Japan.

### **AUTHOR INFORMATION**

#### **Corresponding Author**

\* saeki@chem.eng.osaka-u.ac.jp (A.S.)

This supporting information presents the following contents.

|                                                                     |            |
|---------------------------------------------------------------------|------------|
| <b>1. Synthesis of monomers and polymers (Figures S1–S47) .....</b> | <b>S2</b>  |
| <b>2. Supporting Tables S1–S4 .....</b>                             | <b>S33</b> |
| <b>3. Supporting Schema S1–S2 .....</b>                             | <b>S34</b> |
| <b>4. Supporting Figures S48–S64 .....</b>                          | <b>S35</b> |
| <b>5. Supporting References S1 .....</b>                            | <b>S45</b> |

# 1. Synthesis of monomers and polymers

## Synthesis of monomer

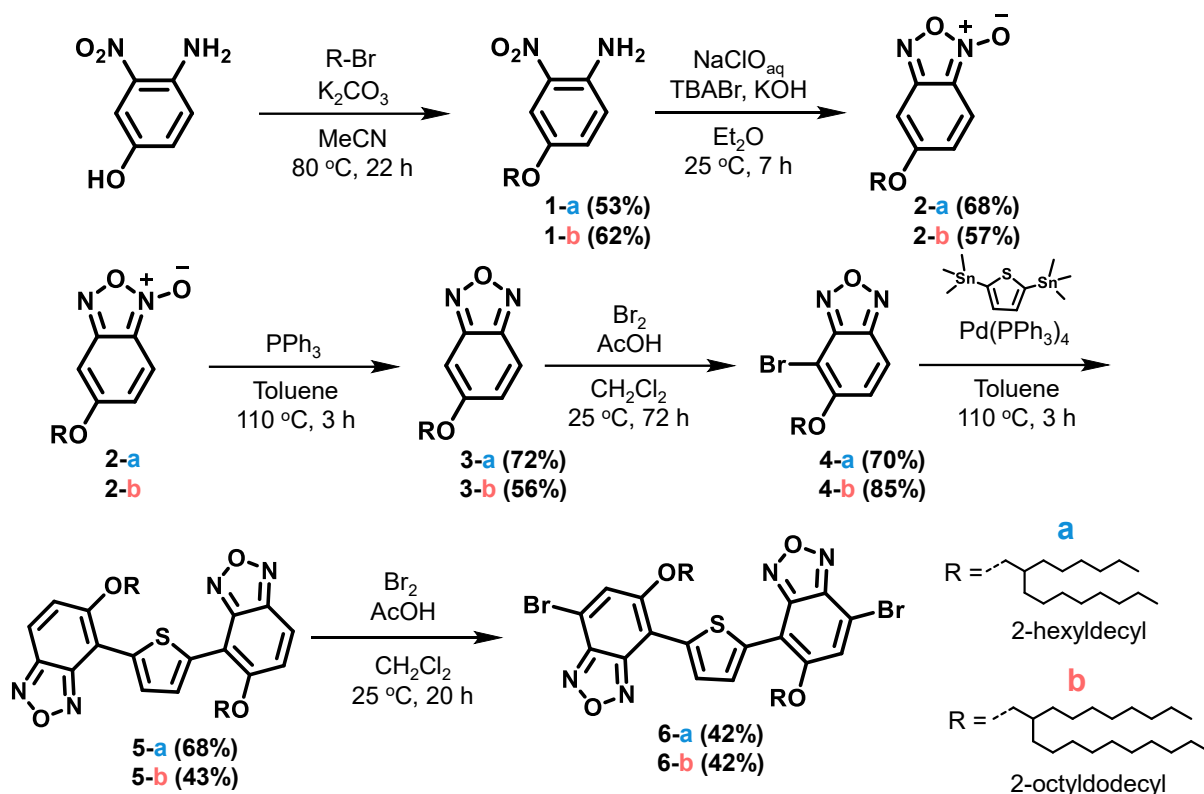

### •Synthesis of 1-a

4-amino-3-nitrophenol (4.01 g, 26 mmol, 1.0 eq),  $K_2CO_3$  (10.8 g, 78.1 mmol, 3.0 eq), 1-bromo-2-hexyldecane (19.3 mL, 61.9 mmol, 2.4 eq) and MeCN (150 mL) were added to a 200 mL two-necked flask under nitrogen atmosphere. Then the mixture was refluxed for 22 h at 80 °C. After that it was quenched with water and extracted with  $CH_2Cl_2$ . After it was washed with brine and dried with anhydrous  $MgSO_4$ , the solvent was evaporated under reduced pressure. The residue was purified with silica-gel column chromatography (hexane/ chloroform = 1/1). As a result, **1-a** was obtained (5.22 g, 13.8 mmol, 53%).  $^1H$  NMR (400 MHz,  $CDCl_3$ )  $\delta$  (ppm): 7.53 (d,  $J$  = 1.6 Hz, 1H), 7.07 (dd,  $J$  = 1.6 Hz, 6.0 Hz, 1H), 6.75 (d,  $J$  = 6.0 Hz, 1H), 3.79 (d,  $J$  = 3.6 Hz, 2H), 1.75 (m, 1H), 1.37 (m, 24H), 0.88 (m, 6H).  $^{13}C$  NMR (151 MHz)  $\delta$  (ppm): 150.72, 139.88, 131.70, 127.29, 120.08, 107.20, 71.83, 38.03, 32.04, 31.98, 31.59, 31.48, 31.47, 30.14, 29.81, 29.71, 29.46, 26.97, 26.94, 22.92, 22.81, 14.25. FT-IR (KBr)  $\nu$ ( $cm^{-1}$ ): 3488, 3364, 2956, 2926, 2853, 1579, 1572, 1521, 1462, 1415, 1372, 1329, 1288, 1246, 1216, 1151, 1078, 1025, 839, 814, 767, 718, 684, 547, 478. HR ESI<sup>+</sup> MS: calcd. For  $C_{22}H_{38}N_2O_3Na$   $[M+Na]^+$  :  $m/z$  = 401.27746; found: 401.27790.

### •Synthesis of 2-a<sup>[30]</sup>

**1-a** (2.08 g, 5.50 mmol, 1.0 eq), Tetrabutylammonium Bromide (TBAB) (0.0301 g, 0.0935 mmol, 0.017 eq), KOH aq (2.16 mL, 23.1 mmol, 50 wt%, 4.2 eq) and diethyl ether (10 mL) were added to a 50 mL two-necked flask. To this mixture, a sodium hypochlorite solution (11 mL, 14.8 mmol, activated chlorine  $\approx$  10%, 2.69 eq) was added dropwise. After stirring at 25 °C for 7 h, the organic layer was separated. The aqueous layer was extracted with  $CH_2Cl_2$ , washed with brine and dried with anhydrous  $MgSO_4$ . The combined organic layers were evaporated under reduced pressure. As a result, **2-a** was obtained (1.42 g, 3.76 mmol, 68%) without further purification. FT-IR (KBr)  $\nu$ ( $cm^{-1}$ ): 2955, 2927, 2855, 1637, 1622, 1602, 1585, 1541, 1495,

1466, 1379, 1313, 1271, 1225, 1192, 1119, 1006, 808. HR ESI<sup>+</sup> MS: calcd. For C<sub>22</sub>H<sub>36</sub>N<sub>2</sub>O<sub>3</sub>Na [M+Na]<sup>+</sup> :  $m/z$  = 399.26181; found: 399.26584.

#### •Synthesis of 3-a<sup>[30]</sup>

**2-a** (1.42 g, 3.76 mmol, 1.0 eq), triphenylphosphine (PPh<sub>3</sub>) (1.20 g, 4.59 mmol, 1.22 eq), and toluene (60 mL) were added to a 100 mL flask. The mixture was refluxed for 3 h then cooled. The solvent was evaporated under reduced pressure. The residue was purified with silicagel column chromatography (hexane/ chloroform = 3/1). As a result, **3-a** was obtained (0.976 g, 3.76 mmol, 72%). <sup>1</sup>H NMR (400 MHz, CDCl<sub>3</sub>)  $\delta$  (ppm): 7.68 (d,  $J$  = 9.6 Hz, 1H), 7.10 (dd,  $J$  = 9.6 Hz, 2.0 Hz, 1H), 6.82 (d,  $J$  = 2.0 Hz, 1H), 3.92 (d,  $J$  = 5.6 Hz, 2H), 1.84 (m, 1H), 1.41 (m, 24H), 0.87 (m, 6H). <sup>13</sup>C NMR (151 MHz)  $\delta$  (ppm): 160.84, 150.12, 146.82, 129.64, 116.90, 89.74, 71.61, 37.50, 31.79, 31.72, 31.23, 31.21, 29.85, 29.52, 29.45, 29.21, 26.71, 26.67, 22.57, 22.56, 13.40, 13.98. FT-IR (KBr)  $\nu$ (cm<sup>-1</sup>): 2955, 2927, 2856, 1635, 1544, 1490, 1467, 1412, 1367, 1349, 1317, 1256, 1216, 1134, 1010, 883, 840, 810, 750, 723, 628, 618, 438. HR EI<sup>+</sup> MS: calcd. For C<sub>22</sub>H<sub>36</sub>N<sub>2</sub>O<sub>2</sub> [M]<sup>+</sup> :  $m/z$  = 360.2777; found: 360.2768.

#### •Synthesis of 4-a<sup>[31]</sup>

**3-a** (0.65 g, 1.81 mmol, 1.0 eq), Br<sub>2</sub> (0.40 mL, 7.69 mmol, 4.15 eq), AcOH (3.29 mL, 30 eq) and CH<sub>2</sub>Cl<sub>2</sub> (40 mL) were added to a 100 mL flask. The mixture was stirred in the dark for 3 days at 25 °C and then poured into NaOH aq (2.5 g in 100 mL). A saturated sodium bisulfite aqueous solution was then added to remove excess bromine. The aqueous layer was extracted with CH<sub>2</sub>Cl<sub>2</sub>, washed with brine and dried with anhydrous MgSO<sub>4</sub>. The combined organic layers were evaporated under reduced pressure. The residue was purified with silicagel column chromatography (hexane/ chloroform = 3/1). As a result, **4-a** was obtained (0.56 g, 1.27 mmol, 70%). <sup>1</sup>H NMR (400 MHz, CDCl<sub>3</sub>)  $\delta$  (ppm): 7.79 (d,  $J$  = 9.6 Hz, 1H), 7.33 (d,  $J$  = 9.6 Hz, 1H), 4.09 (d,  $J$  = 5.6 Hz, 2H), 1.84 (m, 1H), 1.45 (m, 24H), 0.87 (m, 6H). <sup>13</sup>C NMR (151 MHz)  $\delta$  (ppm): 156.94, 150.42, 146.60, 124.24, 116.58, 91.66, 73.80, 38.35, 31.95, 31.86, 31.15, 31.14, 30.00, 29.67, 29.60, 29.37, 26.85, 26.83, 22.73, 22.71, 14.16, 14.15. FT-IR (KBr)  $\nu$ (cm<sup>-1</sup>): 2954, 2927, 2855, 1625, 1540, 1516, 1457, 1378, 1307, 1254, 1063, 1021, 961, 887, 852, 800, 757, 724. HR DART<sup>+</sup> MS: calcd. For C<sub>22</sub>H<sub>35</sub>N<sub>2</sub>O<sub>2</sub>BrH<sup>+</sup> [M+H]<sup>+</sup> :  $m/z$  = 439.19547; found: 439.19431.

#### •Synthesis of 5-a<sup>[31]</sup>

**4-a** (770 mg, 1.75 mmol, 2.0eq), 2,5-Bis(trimethylstannyl)thiophene (360 mg, 0.875 mmol, 1.0 eq), Pd(PPh<sub>3</sub>)<sub>4</sub> (38 mg, 0.033 mmol, 5 mol%), and toluene (30 mL, degassed for 15 min) were added to a 50 mL two-necked flask under nitrogen atmosphere. Then the reaction mixture was refluxed for 16 h. After that, it was filtered by celite to remove Pd catalyst and the solvent was removed under reduced pressure. The residue was purified by silicagel column chromatography (hexane/chloroform = 4/1). As a result, **5-a** was obtained (476 mg, 0.595 mmol, 68%). <sup>1</sup>H NMR (400 MHz, CDCl<sub>3</sub>)  $\delta$  (ppm): 8.45 (s, 1H), 7.73 (d,  $J$  = 9.6 Hz, 1H), 7.48 (d,  $J$  = 9.6 Hz, 1H), 4.21 (d,  $J$  = 6.0 Hz, 2H), 2.04 (m, 1H), 1.45 (m, 24H), 0.84 (m, 6H). <sup>13</sup>C NMR (151 MHz)  $\delta$  (ppm): 154.41, 149.36, 147.06, 135.57, 130.17, 124.56, 115.16, 107.91, 74.37, 38.54, 32.00, 31.97, 31.29, 31.27, 30.14, 29.80, 29.73, 29.45, 26.92, 26.91, 22.78, 22.77, 14.21, 14.18. FT-IR (KBr)  $\nu$ (cm<sup>-1</sup>): 2954, 2926, 2855, 1699, 1684, 1654, 1616, 1558, 1542, 1521, 1507, 1472, 1465, 1457, 1447, 1439, 1341, 1238, 1010, 892, 795, 483, 425, 410. HR MALDI-TOF MS: calcd. For C<sub>48</sub>H<sub>72</sub>N<sub>4</sub>O<sub>4</sub>SN<sup>+</sup> [M+Na]<sup>+</sup> :  $m/z$  = 823.51665; found: 823.51632.

#### •Synthesis of 6-a

**5-a** (528 mg, 0.66 mmol, 1.0 eq), Br<sub>2</sub> (0.068 mL, 1.32 mmol, 2.0 eq), AcOH (1.19 mL, 19.8 mmol, 30 eq) and CH<sub>2</sub>Cl<sub>2</sub> (25 mL) were added to a 50 mL two-necked flask. The mixture was stirred in the dark for 20 h at 25 °C and then poured into NaOH aq (0.5 g in 50 mL). A saturated sodium bisulfite aqueous solution was then added to remove excess bromine. The aqueous layer was extracted with CH<sub>2</sub>Cl<sub>2</sub>, washed with brine and dried with anhydrous MgSO<sub>4</sub>. The combined organic layers were evaporated under reduced pressure. The residue was purified with silicagel column chromatography (hexane/ chloroform = 4/1). As a result, **6-a** was obtained (271 mg, 0.28 mmol, 42%). <sup>1</sup>H NMR (400 MHz, CDCl<sub>3</sub>) δ (ppm): 8.38 (s, 1H), 7.67 (s, 1H), 4.19 (d, *J* = 6.0 Hz, 2H), 2.03 (m, 1H), 1.45 (m, 24H), 0.83 (m, 6H). <sup>13</sup>C NMR (151 MHz) δ (ppm): 154.52, 148.82, 147.42, 135.45, 130.37, 126.93, 107.21, 107.18, 74.84, 38.50, 32.01, 31.97, 31.27, 31.26, 30.12, 29.79, 29.73, 29.47, 26.91, 26.90, 22.79, 22.78, 14.22, 14.19. FT-IR (KBr) ν(cm<sup>-1</sup>): 2954, 2927, 2855, 1698, 1684, 1653, 1647, 1636, 1625, 1617, 1604, 1558, 1541, 1522, 1507, 1472, 1465, 1457, 1337, 1216, 1014, 876, 810. HR MALDI-TOF MS: calcd. For C<sub>48</sub>H<sub>70</sub>N<sub>4</sub>O<sub>4</sub>SBr<sub>2</sub> [M] : *m/z* = 979.33767; found: 979.3383.

#### •Synthesis of 1-b

**1-b** was synthesized by the same procedure as **1-a** using 1-bromo-2-octyldodecane instead of 1-bromo-2-hexyldecane (7.24 g, 62%). <sup>1</sup>H NMR (600 MHz, CDCl<sub>3</sub>) δ (ppm): 7.54 (d, *J* = 2.8 Hz, 1H), 7.07 (dd, *J* = 2.8 Hz, 9.2 Hz, 1H), 6.75 (d, *J* = 9.2 Hz, 1H), 3.79 (d, *J* = 5.6 Hz, 2H), 1.75 (m, 1H), 1.36 (m, 32H), 0.88 (m, 6H). <sup>13</sup>C NMR (151 MHz) δ (ppm): 150.69, 139.91, 131.65, 127.28, 120.07, 107.15, 71.80, 38.01, 32.05, 32.03, 31.45, 30.13, 29.79, 29.77, 29.75, 29.71, 29.48, 29.45, 26.96, 22.81, 22.80, 14.23. FT-IR (KBr) ν(cm<sup>-1</sup>): 3490, 3371, 2956, 2925, 2854, 1587, 1571, 1518, 1467, 1417, 1378, 1332, 1283, 1251, 1222, 1155, 1088, 1031, 820, 763, 723, 687, 604, 581, 553, 436, 417. HR ESI<sup>+</sup> MS: calcd. For C<sub>26</sub>H<sub>46</sub>N<sub>2</sub>O<sub>3</sub>H<sup>+</sup> [M+H]<sup>+</sup> : *m/z* = 435.35812; found: 435.35923.

#### •Synthesis of 2-b

**2-b** was synthesized by the same procedure as **2-a** (2.90 g, 57%). FT-IR (KBr) ν(cm<sup>-1</sup>): 2953, 2925, 2854, 1621, 1601, 1585, 1541, 1495, 1466, 1378, 1312, 1271, 1225, 1192, 1119, 1006, 808, 722, 625, 590, 557. HR EI<sup>+</sup> MS: calcd. For C<sub>26</sub>H<sub>44</sub>N<sub>2</sub>O<sub>3</sub> [M]<sup>+</sup> : *m/z* = 432.3352; found: 433.3351.

#### •Synthesis of 3-b

**3-b** was synthesized by the same procedure as **3-a** (1.47 g, 56%). <sup>1</sup>H NMR (400 MHz, CDCl<sub>3</sub>) δ (ppm): 7.68 (d, *J* = 9.6 Hz, 1H), 7.10 (dd, *J* = 9.6 Hz, 2.0 Hz, 1H), 6.82 (d, *J* = 2.0 Hz, 1H), 3.92 (d, *J* = 5.6 Hz, 2H), 1.83 (m, 1H), 1.39 (m, 32H), 0.88 (m, 6H). <sup>13</sup>C NMR (151 MHz) δ (ppm): 160.81, 150.09, 146.79, 129.60, 116.88, 89.74, 71.60, 37.49, 31.81, 31.79, 31.31, 31.21, 31.09, 29.85, 29.76, 29.55, 29.53, 29.49, 29.45, 29.31, 29.24, 29.21, 29.15, 26.81, 26.71, 26.58, 22.58, 22.56, 13.40, 13.99. FT-IR (KBr) ν(cm<sup>-1</sup>): 2958, 2925, 2855, 1635, 1544, 1490, 1467, 1367, 1317, 1256, 1216, 1134, 1010, 883, 840, 809, 755, 722, 629, 582, 533, 477, 435, 420. HR DART<sup>+</sup> MS: calcd. For C<sub>26</sub>H<sub>44</sub>N<sub>2</sub>O<sub>2</sub>H<sup>+</sup> [M+H]<sup>+</sup> : *m/z* = 417.34756; found: 417.34794.

#### •Synthesis of 4-b

**4-b** was synthesized by the same procedure as **4-a** (1.13 g, 85%). <sup>1</sup>H NMR (400 MHz, CDCl<sub>3</sub>) δ (ppm): 7.79 (d, *J* = 9.6 Hz, 1H), 7.33 (d, *J* = 9.6 Hz, 1H), 4.09 (d, *J* = 5.6 Hz, 2H), 1.84 (m, 1H), 1.41 (m, 32H), 0.87 (m, 6H). <sup>13</sup>C NMR (151 MHz) δ (ppm): 156.80, 150.20, 146.40, 124.02, 116.38, 91.37, 73.61, 38.27, 31.91, 31.90, 31.58, 31.08, 29.95, 29.67, 29.65, 29.59, 29.55, 29.36, 29.33, 26.78, 22.67, 22.66, 22.63, 14.05. FT-IR (KBr) ν(cm<sup>-1</sup>): 2958, 2926, 2854, 1625, 1540, 1516, 1458, 1378, 1307, 1254, 1159, 1064, 1021, 963, 887, 852, 800, 757, 722,

643, 625, 564. HR DART<sup>+</sup> MS: calcd. For C<sub>26</sub>H<sub>43</sub>N<sub>2</sub>O<sub>2</sub>BrH<sup>+</sup> [M+H]<sup>+</sup> :  $m/z$  = 495.25807; found: 495.25791.

#### •Synthesis of 5-b

**5-b** was synthesized by the same procedure as **5-a** (385 mg, 43%). <sup>1</sup>H NMR (400 MHz, CDCl<sub>3</sub>)  $\delta$  (ppm): 8.45 (s, 1H), 7.73 (d,  $J$  = 6.4 Hz, 1H), 7.48 (d,  $J$  = 6.4 Hz, 1H), 4.21 (d,  $J$  = 4.0 Hz, 2H), 2.04 (m, 1H), 1.47 (m, 32H), 0.84 (m, 6H). <sup>13</sup>C NMR (151 MHz)  $\delta$  (ppm): 154.37, 149.33, 147.04, 135.57, 130.16, 124.56, 115.16, 107.90, 74.35, 38.51, 32.03, 32.00, 31.26, 30.14, 29.80, 29.78, 29.76, 29.73, 29.47, 29.46, 26.92, 22.81, 22.78, 14.24, 14.21. FT-IR (KBr)  $\nu$ (cm<sup>-1</sup>): 2951, 2925, 2854, 1542, 1457, 1342, 1237, 1061, 1061, 1010, 891, 798, 644, 588, 576, 441. HR MALDI-TOF MS: calcd. For C<sub>56</sub>H<sub>88</sub>N<sub>4</sub>O<sub>4</sub>SNa<sup>+</sup> [M+Na]<sup>+</sup> :  $m/z$  = 935.64185; found: 935.64235.

#### •Synthesis of 6-b

**6-b** was synthesized by the same procedure as **6-a** (109 mg, 42%). <sup>1</sup>H NMR (600 MHz, CDCl<sub>3</sub>)  $\delta$  (ppm): 8.39 (s, 1H), 7.67 (s, 1H), 4.21 (d,  $J$  = 6.0 Hz, 2H), 2.04 (m, 1H), 1.47 (m, 32H), 0.86 (m, 6H). <sup>13</sup>C NMR (151 MHz)  $\delta$  (ppm): 154.49, 148.81, 147.42, 135.45, 130.38, 126.91, 107.23, 107.18, 74.84, 38.48, 32.04, 32.02, 31.26, 30.13, 29.82, 29.79, 29.78, 29.74, 29.49, 29.48, 26.93, 22.82, 22.80, 14.25, 14.23. FT-IR (KBr)  $\nu$ (cm<sup>-1</sup>): 2954, 2926, 2854, 1604, 1536, 1466, 1433, 1379, 1358, 1333, 1299, 1233, 1216, 1176, 1095, 1014, 895, 875, 811, 722, 512. HR MALDI-TOF MS: calcd. For C<sub>56</sub>H<sub>86</sub>N<sub>4</sub>O<sub>4</sub>SBr<sub>2</sub> [M] :  $m/z$  = 1068.47310; found: 1068.47521.

## Synthesis of Polymers

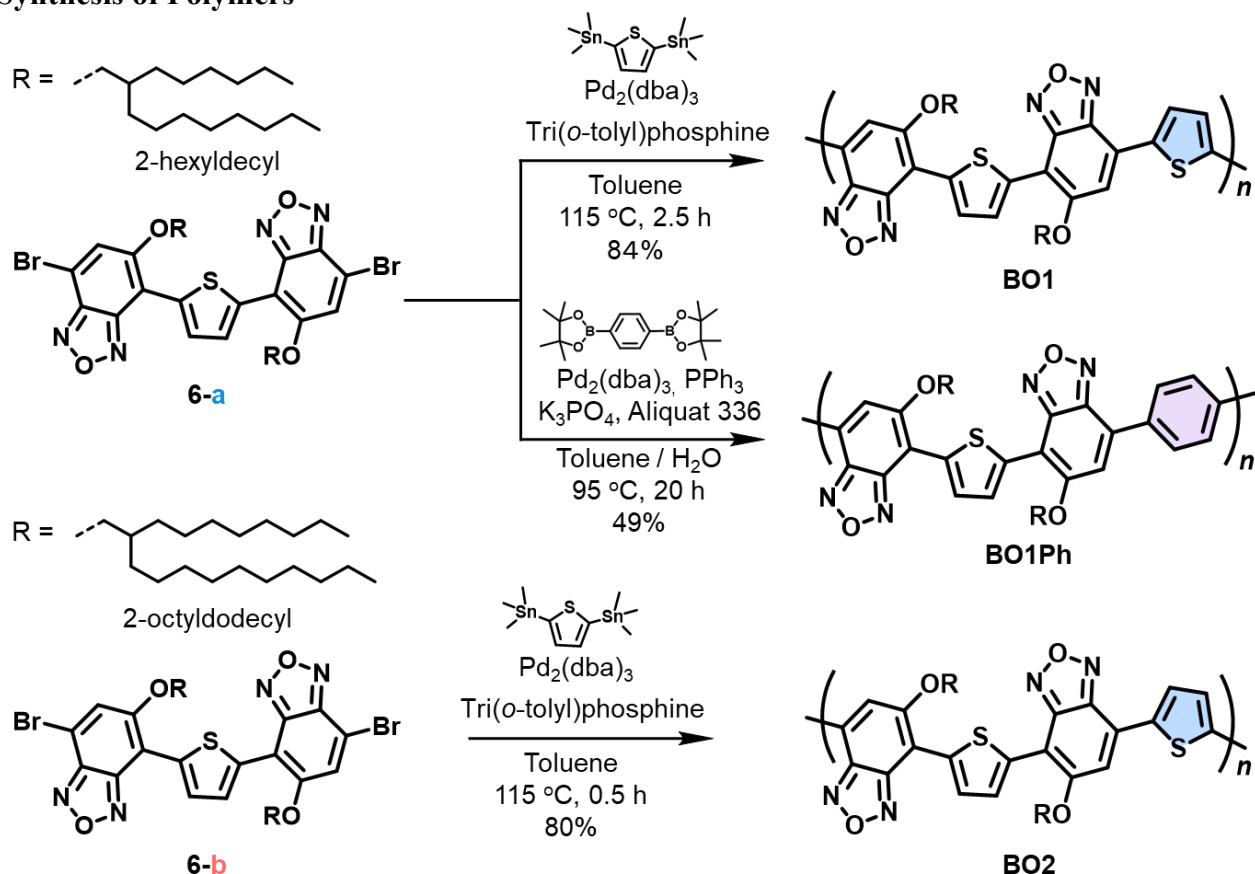

### •Synthesis of BO1

**6-a** (63 mg, 0.0657 mmol, 1.0eq), 2,5-Bis(trimethylstannyl)thiophene (26.9 mg, 0.0657 mmol, 1.0 eq), Tri(*o*-tolyl)phosphine (1.60 mg, 0.00526 mmol, 8 mol%),  $\text{Pd}_2\text{dba}_3$  (1.23 mg, 0.00132 mmol, 2 mol%), and toluene (4 ml, degassed for 15 min) were added to a 10 mL two-necked flask under nitrogen atmosphere. Then the reaction mixture was stirred for 2.5 h at 110 °C. After that, it was cooled and precipitated into the methanol. Then soxhlet extraction was carried out with methanol, hexane, acetone, and chloroform. The chloroform fraction was evaporated and precipitated from methanol to get **BO1** (44 mg, 84%). Molecular weight cannot be measured accurately due to the exclusion limit of GPC ( $\text{CHCl}_3$  at 40 °C) and aggregation of polymer.  $^1\text{H}$  NMR (600 MHz,  $\text{CDCl}_3$ )  $\delta$  (ppm): 7.71 (m), 7.52(m), 3.54(m), 1.33 (m), 0.88 (m).

### •Synthesis of BO2

**6-b** (57 mg, 0.053 mmol, 1.0 eq), 2,5-Bis(trimethylstannyl)thiophene (21.8 mg, 0.053 mmol, 1.0 eq), Tri(*o*-tolyl) phosphine (1.30 mg, 0.00424 mmol, 8 mol%),  $\text{Pd}_2\text{dba}_3$  (0.98 mg, 0.00106 mmol, 2 mol%), and toluene (6 ml, degassed for 15 min) were added to a 10 mL two-necked flask under nitrogen atmosphere. Then the reaction mixture was stirred for 0.5 h at 110 °C. After that, it was cooled and precipitated into the methanol. The residue was purified by GPC ( $\text{CHCl}_3$  at 40 °C) to obtain **BO2** (42 mg,  $M_n$  = 32.7 kDa,  $M_n/M_w$  = 1.9, 80%).  $^1\text{H}$  NMR (600 MHz,  $\text{CDCl}_3$ )  $\delta$  (ppm): 7.71 (m), 7.52(m), 4.05(m), 1.45 (m), 0.94 (m).

### •Synthesis of BO1Ph

**6-a** (83 mg, 0.0866 mmol, 1.0 eq), 1,4-Benzenediboronic acid bis(pinacol) Ester (28.6 mg, 0.0866 mmol, 1.0 eq),  $\text{K}_3\text{PO}_4$  (40.4 mg, 0.191 mmol, 2.2 eq),  $\text{PPh}_3$  (2.68 mg, 0.0103 mmol, 0.12 eq),  $\text{Pd}_2\text{dba}_3$  (4.76 mg, 0.00520 mmol, 6 mol%) toluene (2.4 mL, degassed for 15 min) and

water (0.6 mL, degassed for 15 min) were added to a 10 ml two-necked flask under nitrogen atmosphere. Then the reaction mixture was stirred for 16 h at 95 °C. After that, it was cooled and precipitated into the methanol. The residue was purified by GPC (CHCl<sub>3</sub> at 40°C) to obtain **BO1Ph** (37 mg,  $M_n$  = 31.5 kDa,  $M_n/M_w$  = 2.6, 49%). <sup>1</sup>H NMR (600 MHz, CDCl<sub>3</sub>)  $\delta$  (ppm): 7.70 (m), 7.52(m), 4.30(m), 1.45 (m), 0.87 (m).

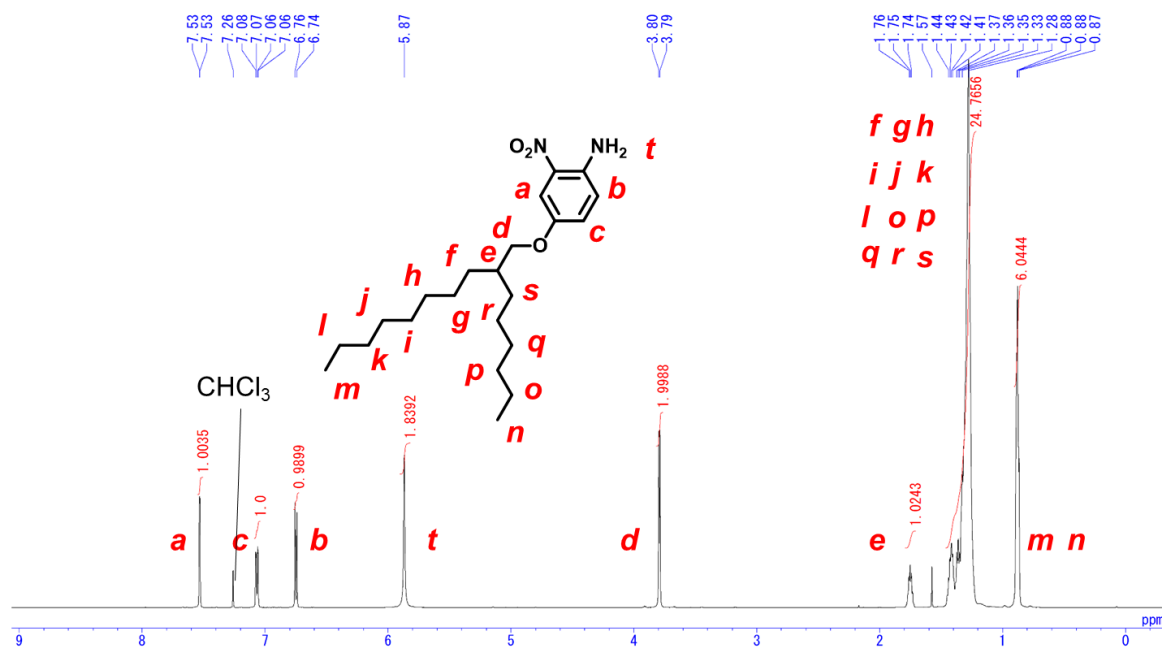

**Figure S1.**  $^1\text{H}$  NMR spectrum of **1-a** (400 MHz,  $\text{CDCl}_3$ ).

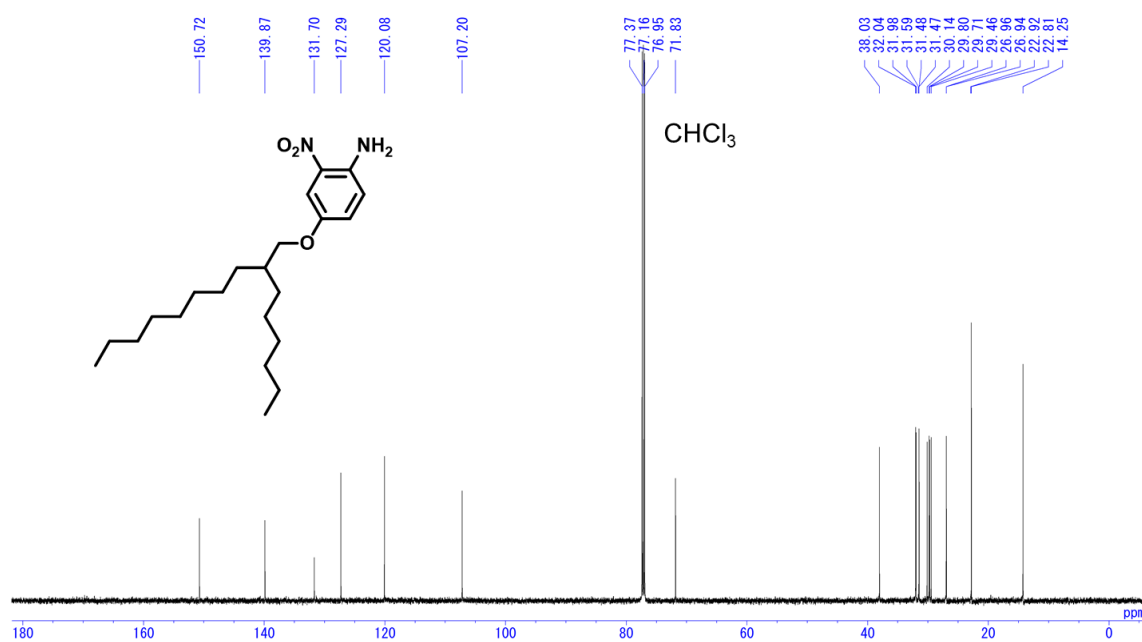

**Figure S2.**  $^{13}\text{C}$  NMR spectrum of **1-a** (151 MHz,  $\text{CDCl}_3$ ).



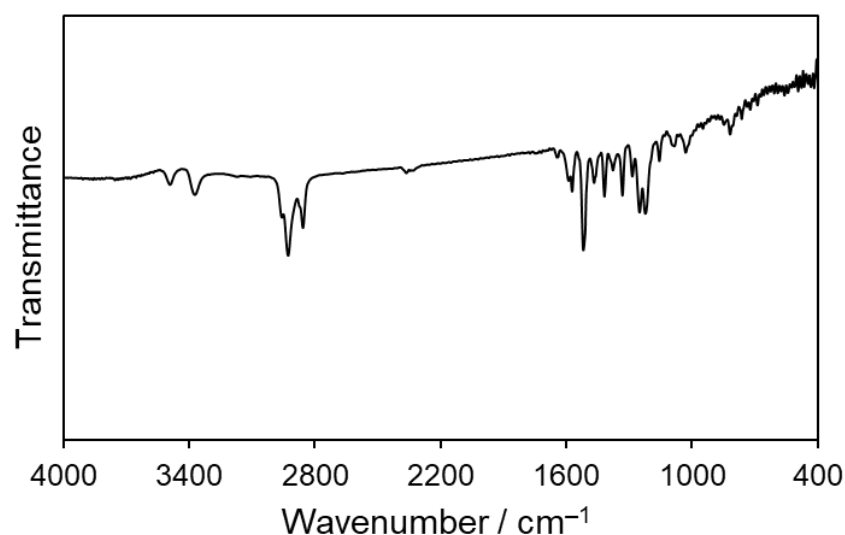

**Figure S3.** FT-IR spectrum of **1-a** (KBr).

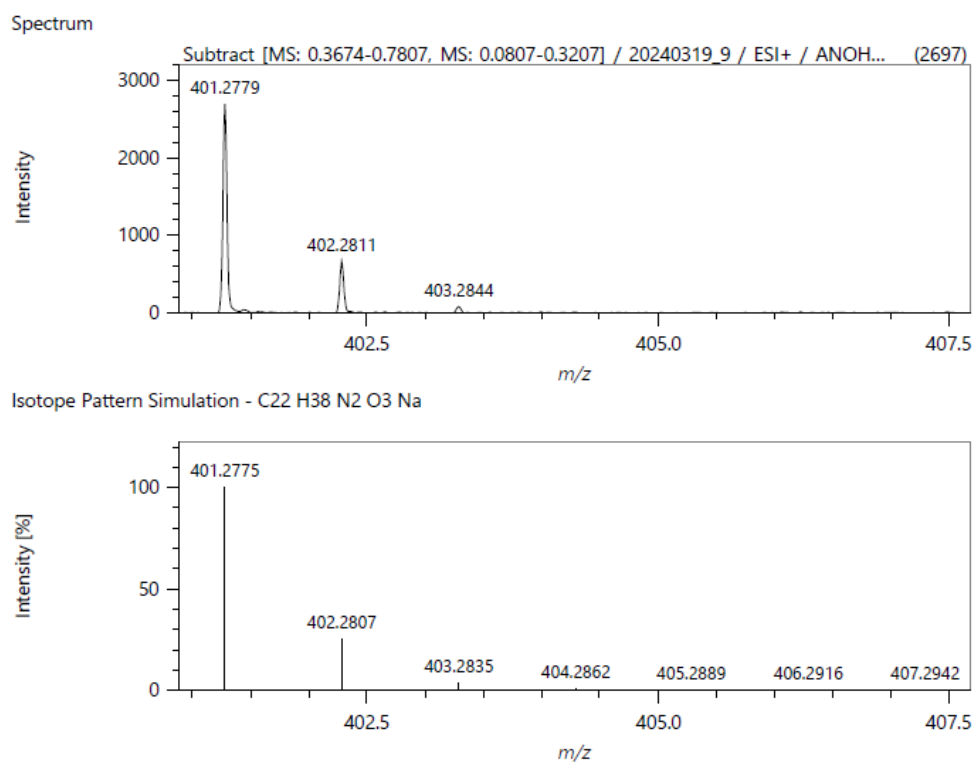

#### Elemental Composition

|            |             |                 |    |     |   |   |    |
|------------|-------------|-----------------|----|-----|---|---|----|
| Parameters |             | Elements Set 1: |    |     |   |   |    |
| Tolerance: | 10.00 mDa   | Symbol          | C  | H   | N | O | Na |
| Electron:  | Odd/Even    | Min             | 0  | 0   | 0 | 0 | 1  |
| Charge:    | +1          | Max             | 40 | 100 | 2 | 3 | 1  |
| DBE:       | -1.5 - 40.0 |                 |    |     |   |   |    |

#### Results

| Mass      | Intensity | Formula          | Calculated Mass | Mass Difference [mDa] | Mass Difference [ppm] | DBE |
|-----------|-----------|------------------|-----------------|-----------------------|-----------------------|-----|
| 401.27790 | 2696.58   | C22 H38 N2 O3 Na | 401.27746       | 0.43                  | 1.08                  | 4.5 |
|           |           | C27 H38 O Na     | 401.28149       | -3.59                 | -8.94                 | 8.5 |
|           |           | C26 H36 N O Na   | 401.26891       | 8.99                  | 22.40                 | 9.0 |

**Figure S4.** ESI+ mass spectrum of **1-a**.

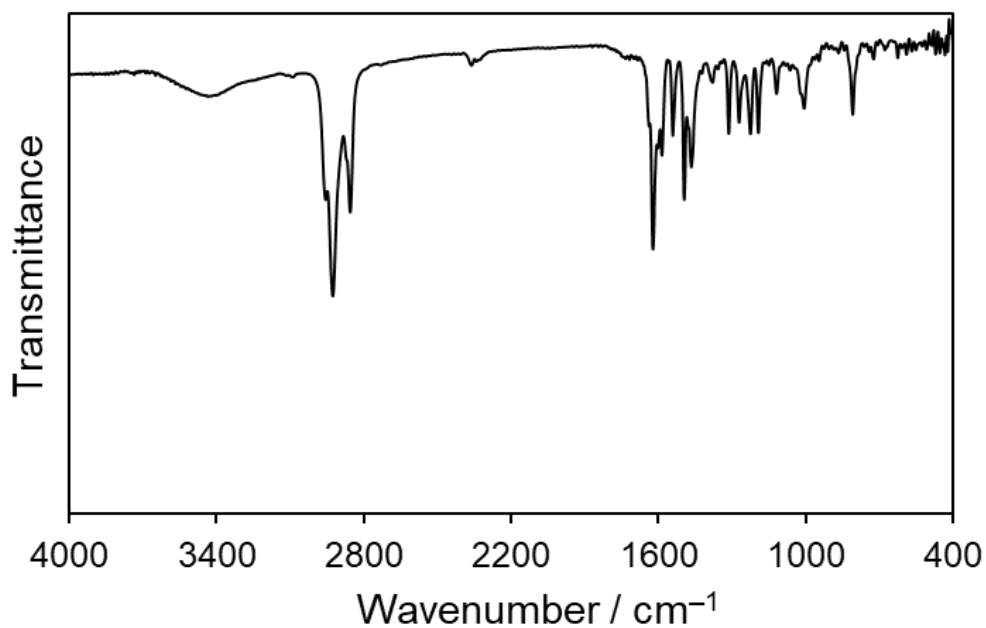

**Figure S5.** FT-IR spectrum of **2-a** (KBr).

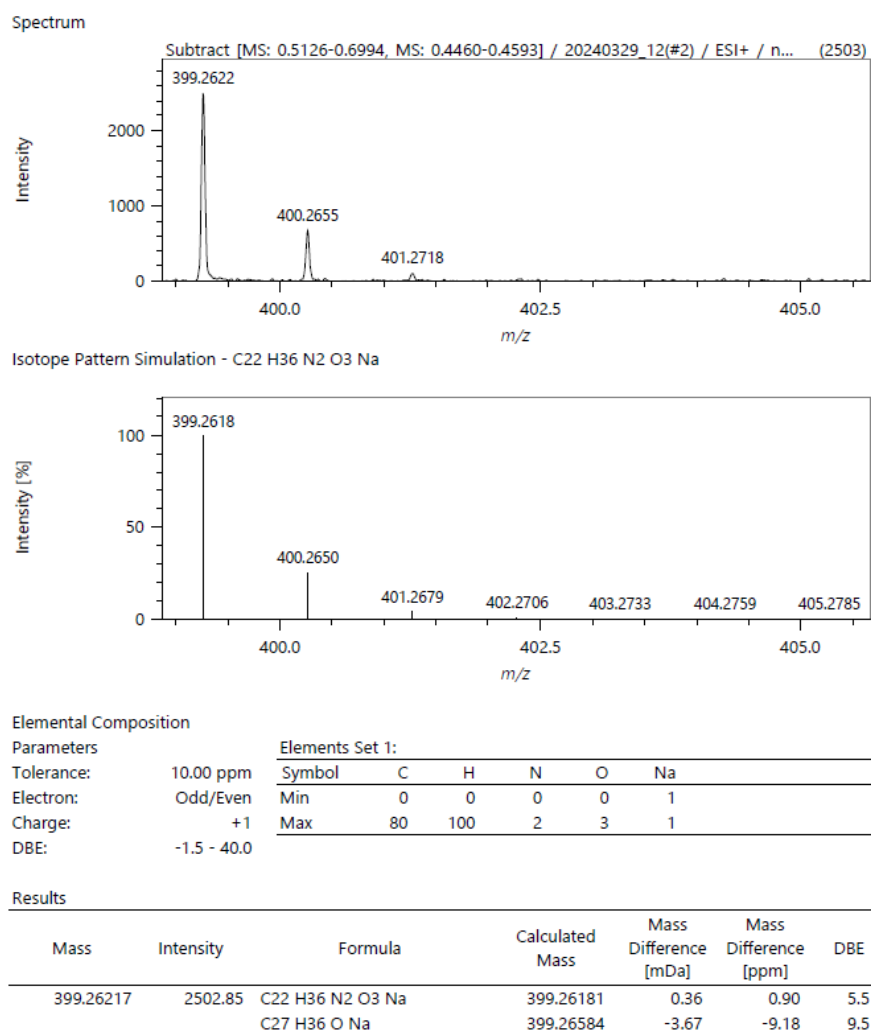

**Figure S6.** ESI+ mass spectrum of **2-a**.

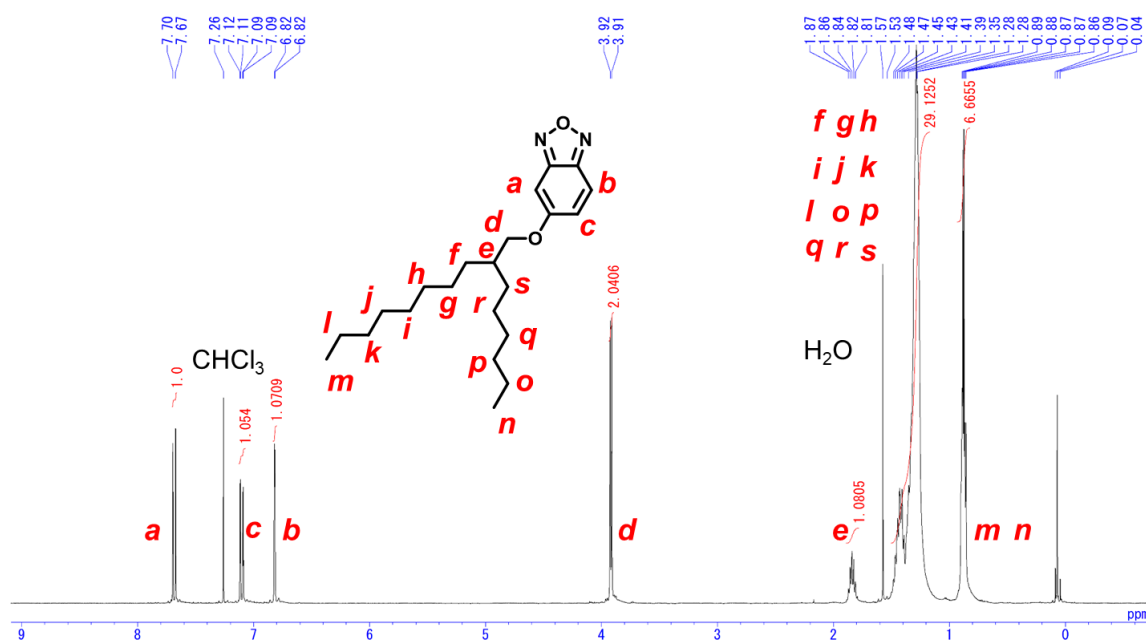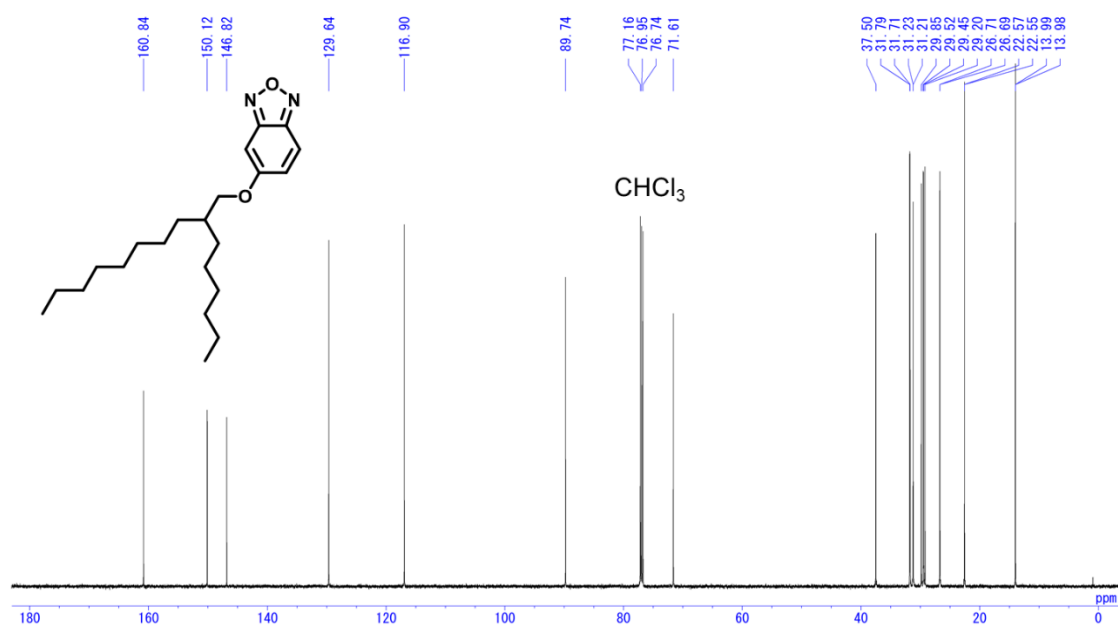

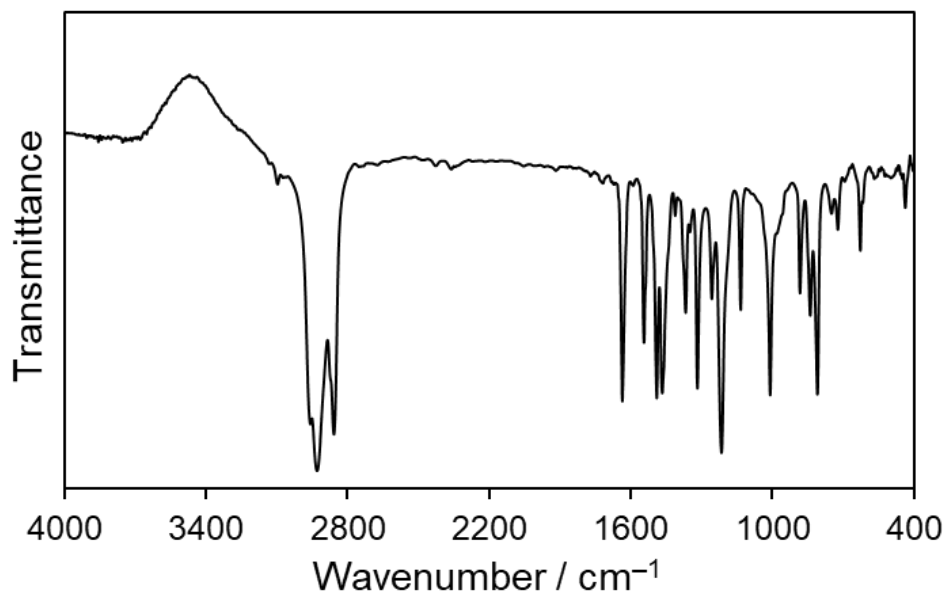

**Figure S9.** FT-IR spectrum of **3-a** (KBr).

[ Molecular Formula ]

Data : Saeki\_lab HR-066 Date : 01-Nov-2024 15:42

Instrument : JMS-700

Sample : OHD-comp.3

Inlet : Direct Ion Mode : EI+

RT : 0.90 min Molecular Formula : C22 H36 N2 O2

Elements : C 80/0, H 100/0, N 2/0, O 2/0

Mass Tolerance : 10mmu

Unsaturation (U.S.) : -0.5 - 15.0

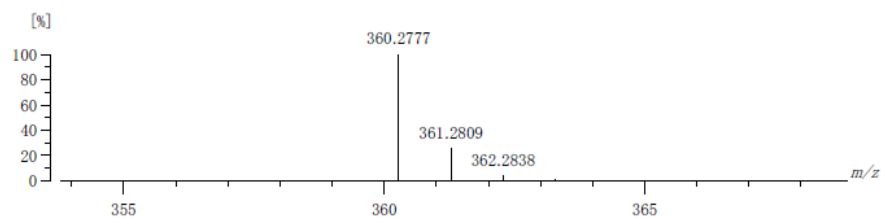

[ Mass Spectrum ]

Data : Saeki\_lab HR-066 Date : 01-Nov-2024 15:42

RT : 0.90 min Scan# : (28,31)

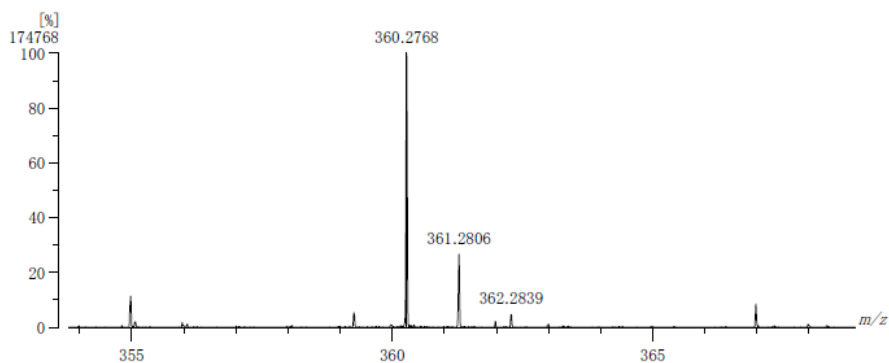

|   | Observed m/z | Int%   | Err[ppm / mmu] | U.S. | Composition   |
|---|--------------|--------|----------------|------|---------------|
| 1 | 360.2768     | 100.00 | -13.6 / -4.9   | 10.0 | C27 H36       |
| 2 |              |        | +21.3 / +7.7   | 10.5 | C26 H34 N     |
| 3 |              |        | -2.4 / -0.9    | 6.0  | C22 H36 N2 O2 |

**Figure S10.** EI+ mass spectrum of **3-a**.

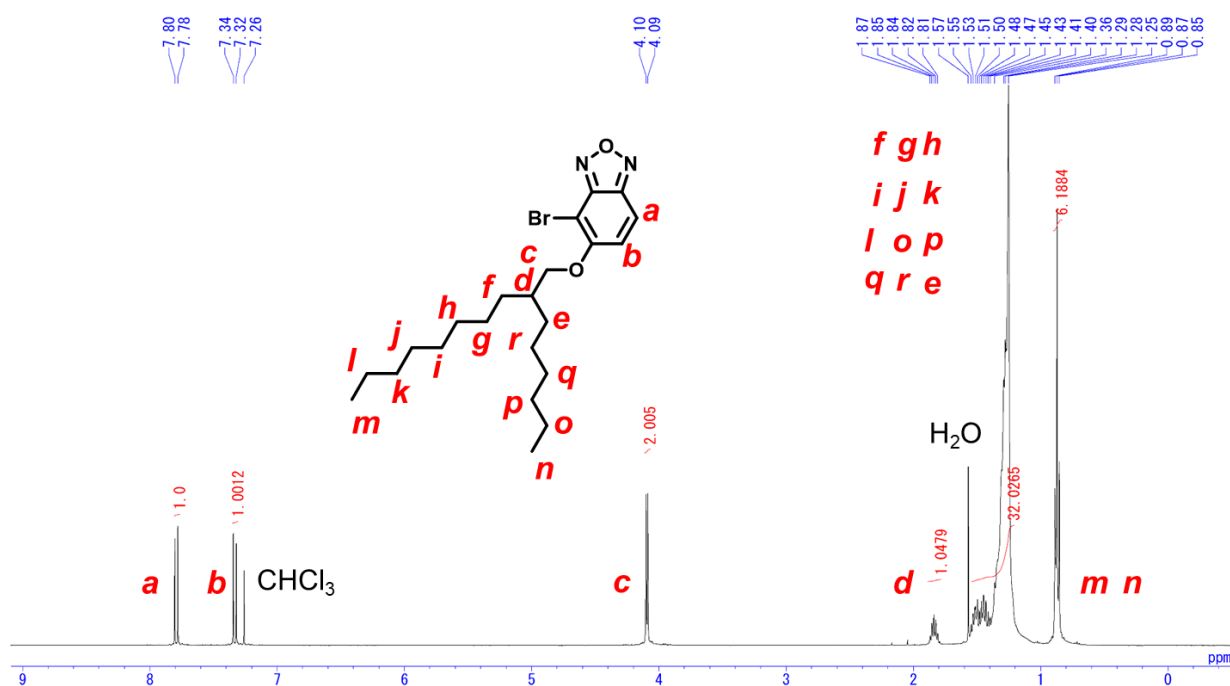

**Figure S11.** <sup>1</sup>H NMR spectrum of **4-a** (400 MHz, CDCl<sub>3</sub>).

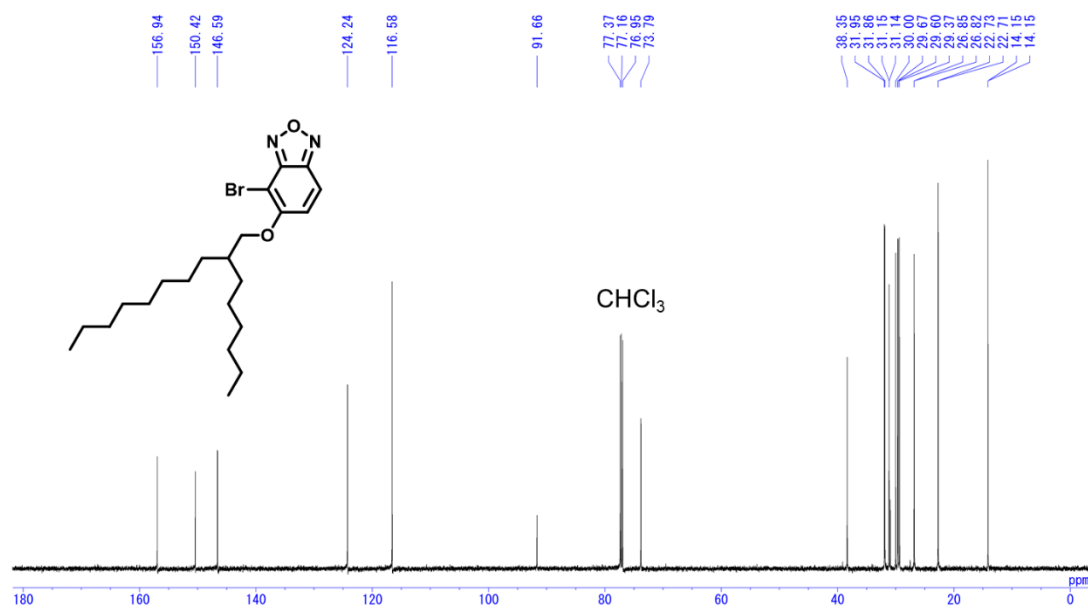

**Figure S12.** <sup>13</sup>C NMR spectrum of **4-a** (151 MHz, CDCl<sub>3</sub>).

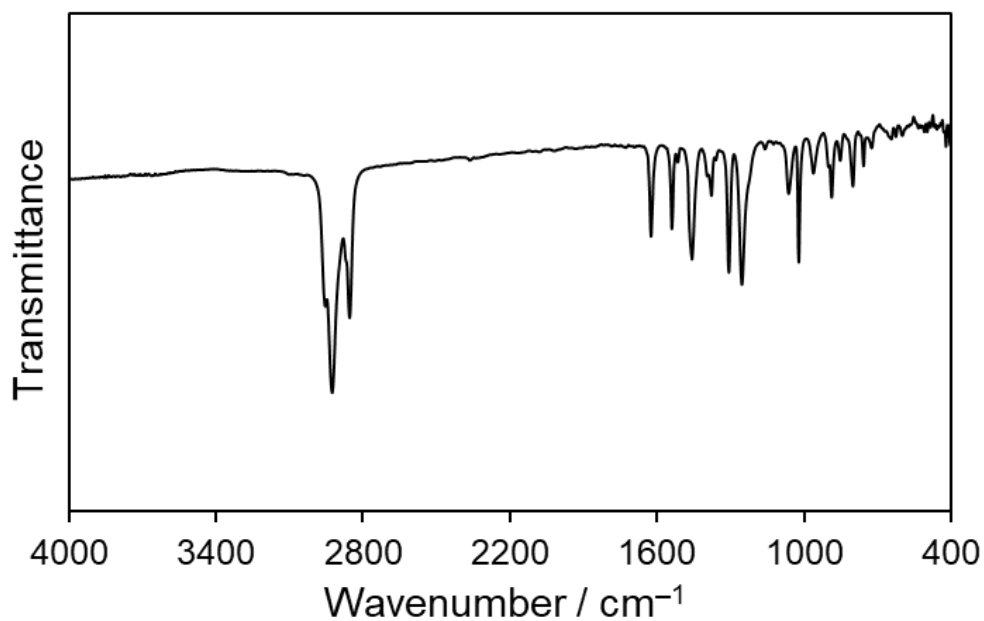

**Figure S13.** FT-IR spectrum of **4-a** (KBr).

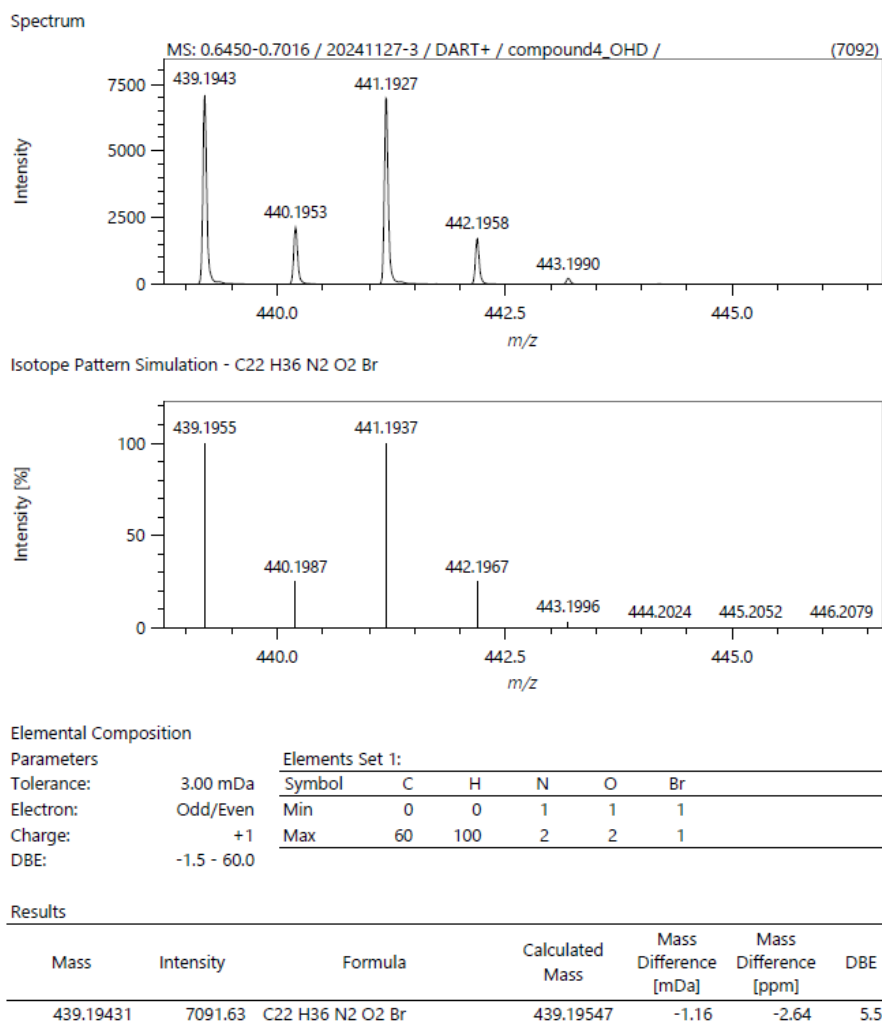

**Figure S14.** DART+ mass spectrum of **4-a**.

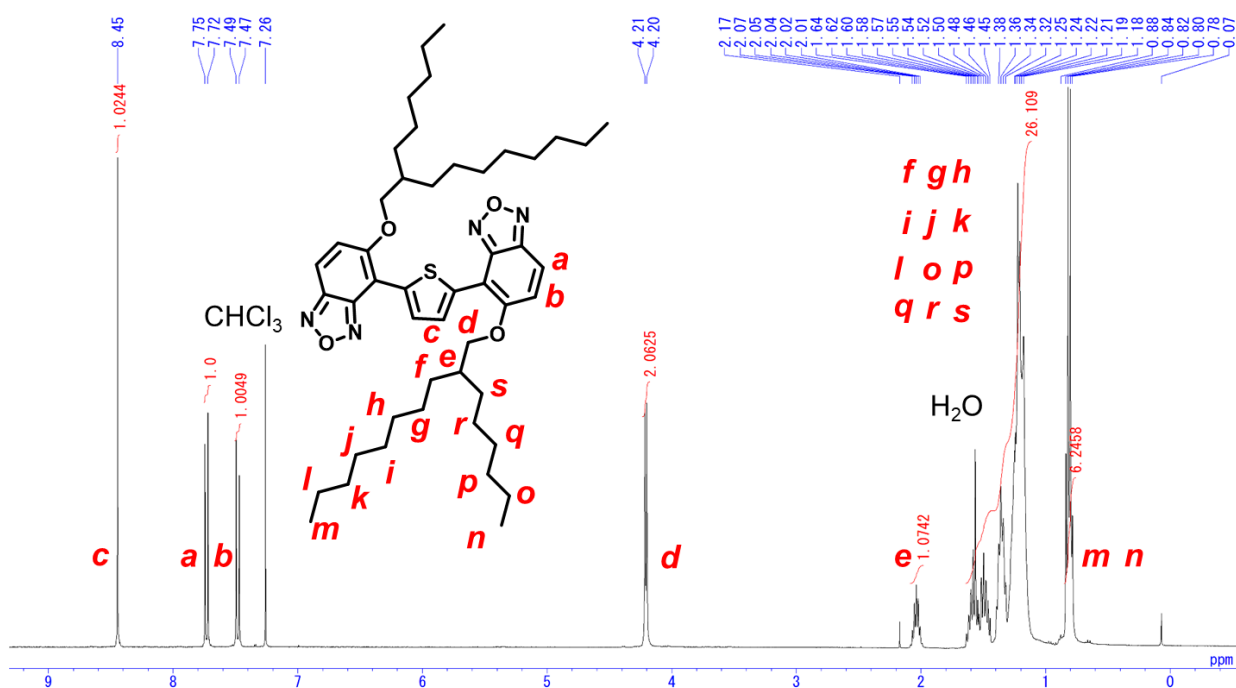

**Figure S15.**  $^1\text{H}$  NMR spectrum of **5-a** (400 MHz,  $\text{CDCl}_3$ ).

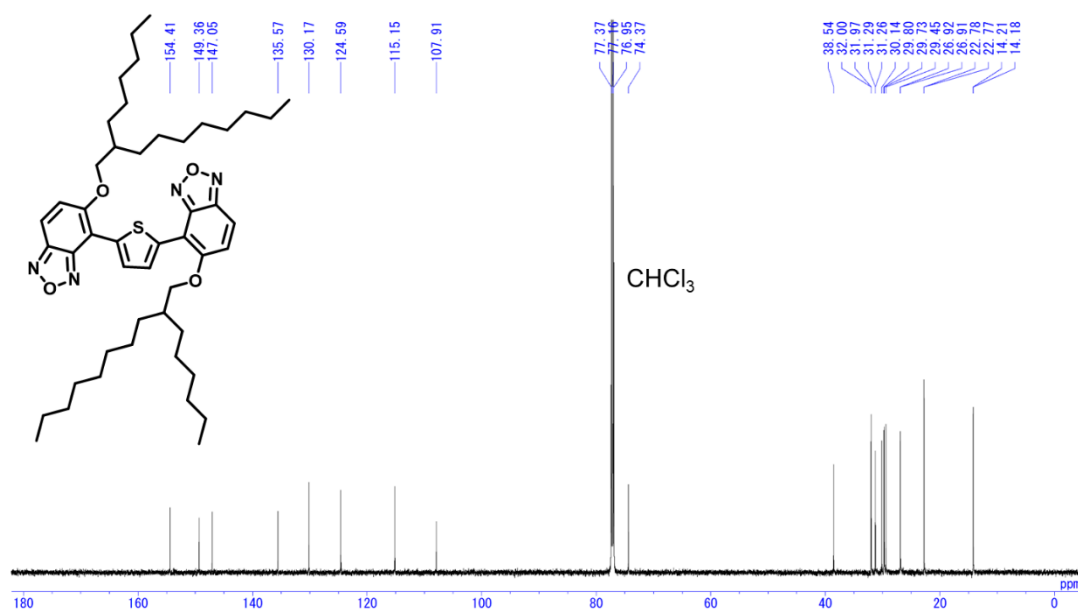

**Figure S16.**  $^{13}\text{C}$  NMR spectrum of **5-a** (151 MHz,  $\text{CDCl}_3$ ).

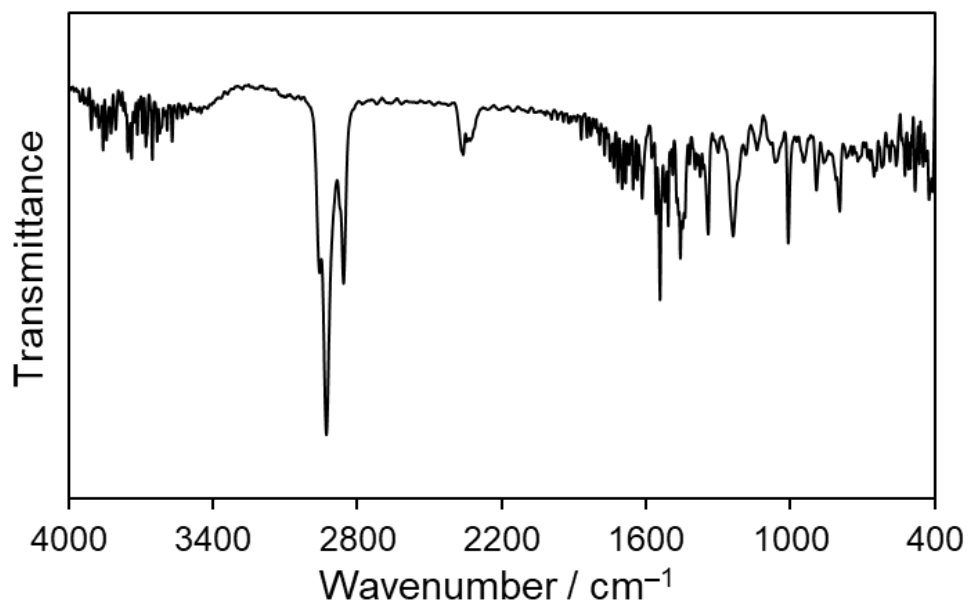

**Figure S17.** FT-IR spectrum of **5-a** (KBr).

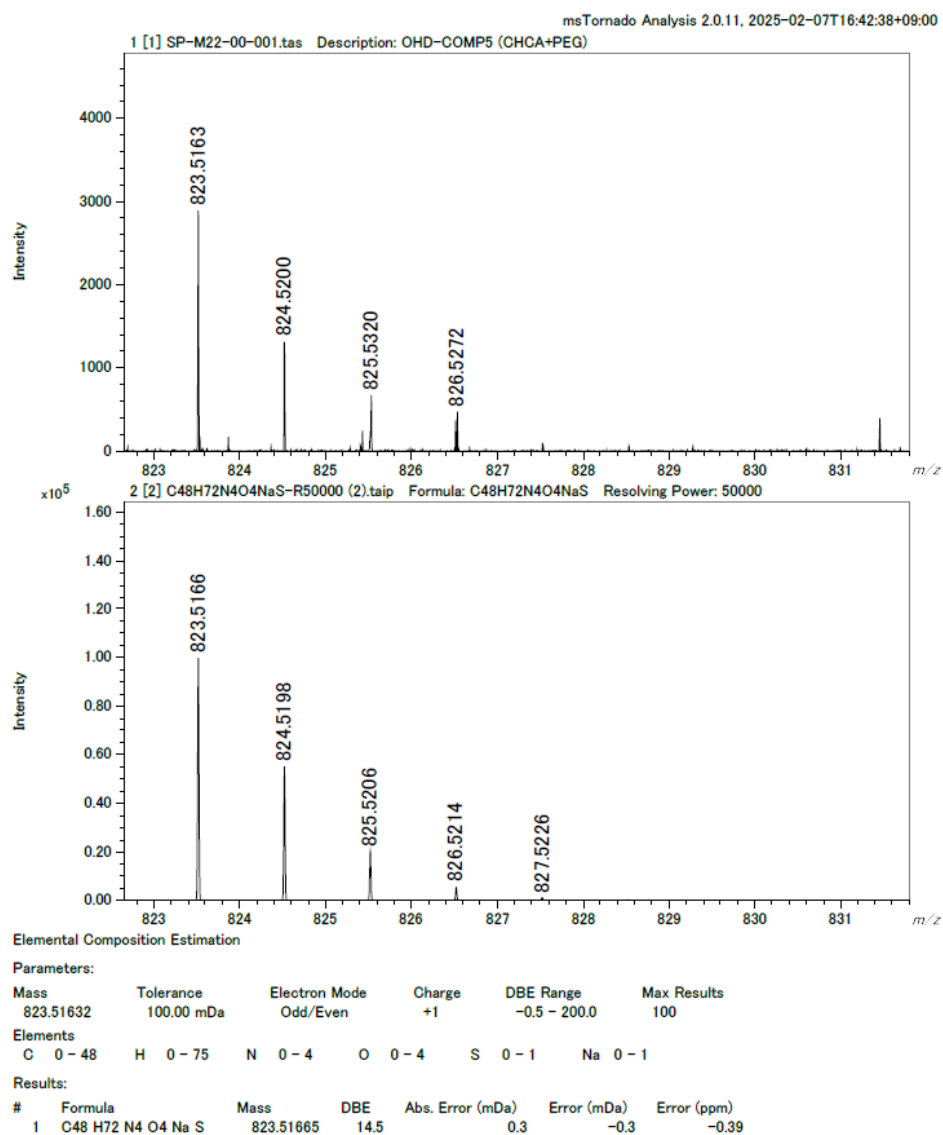

**Figure S18.** MALDI-TOF mass spectrum of **5-a**.



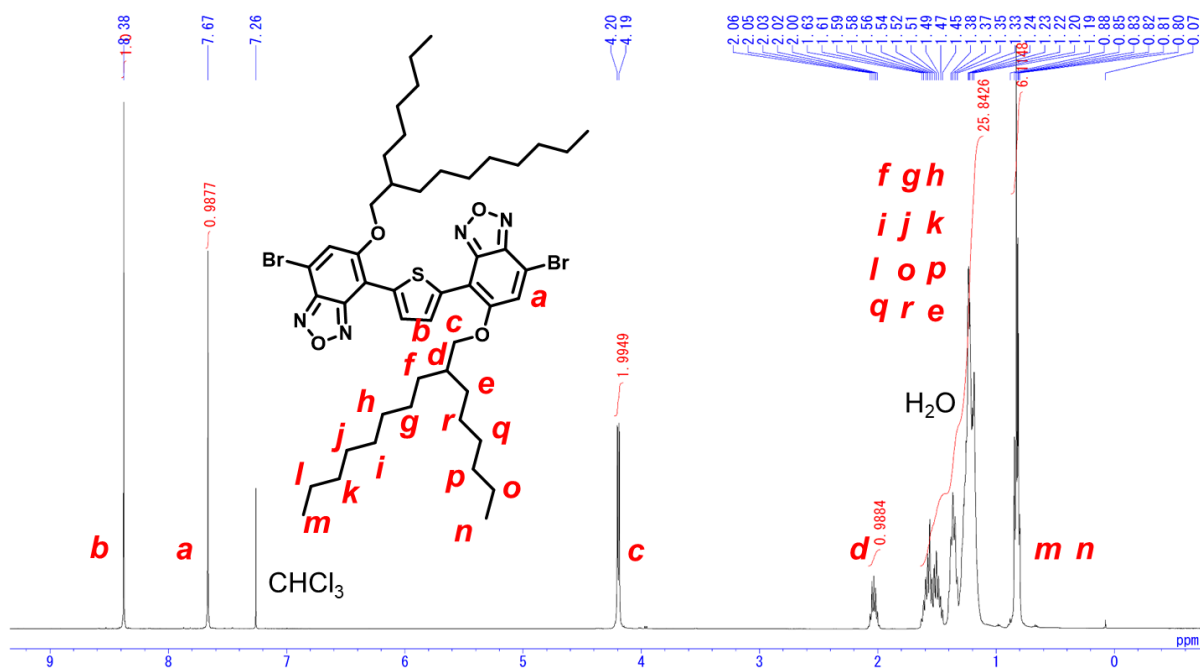

Figure S19.  $^1\text{H}$  NMR spectrum of **6-a** (400 MHz,  $\text{CDCl}_3$ ).

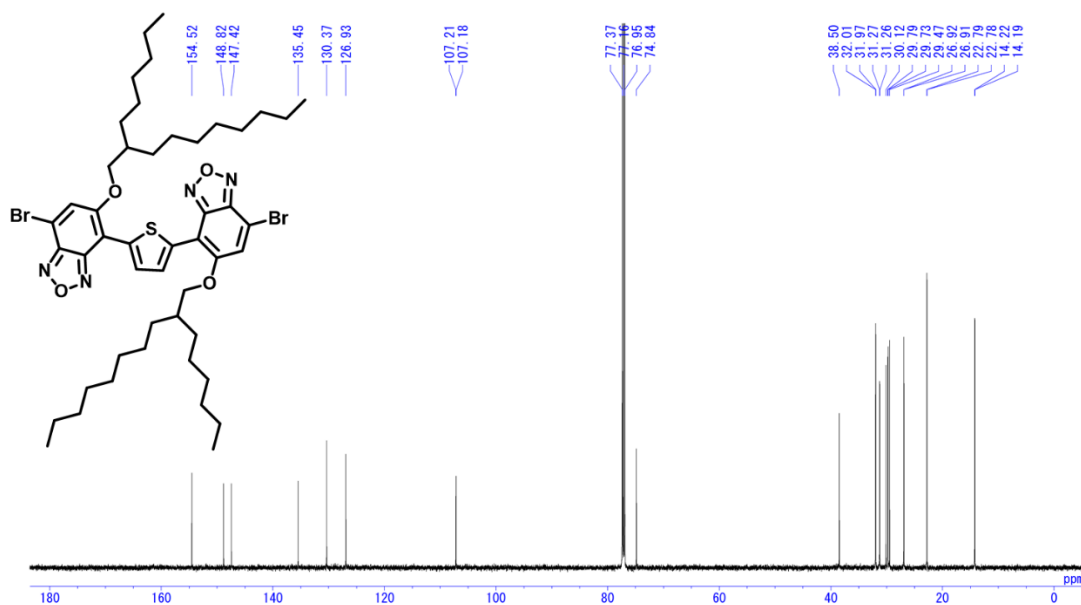

Figure S20.  $^{13}\text{C}$  NMR spectrum of **6-a** (151 MHz,  $\text{CDCl}_3$ ).

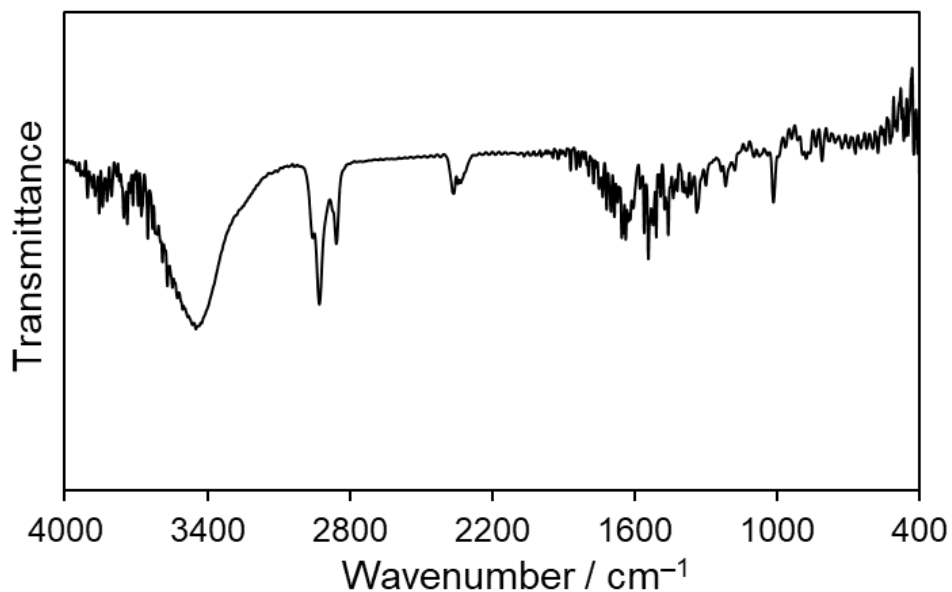

**Figure S21.** FT-IR spectrum of **6-a** (KBr).

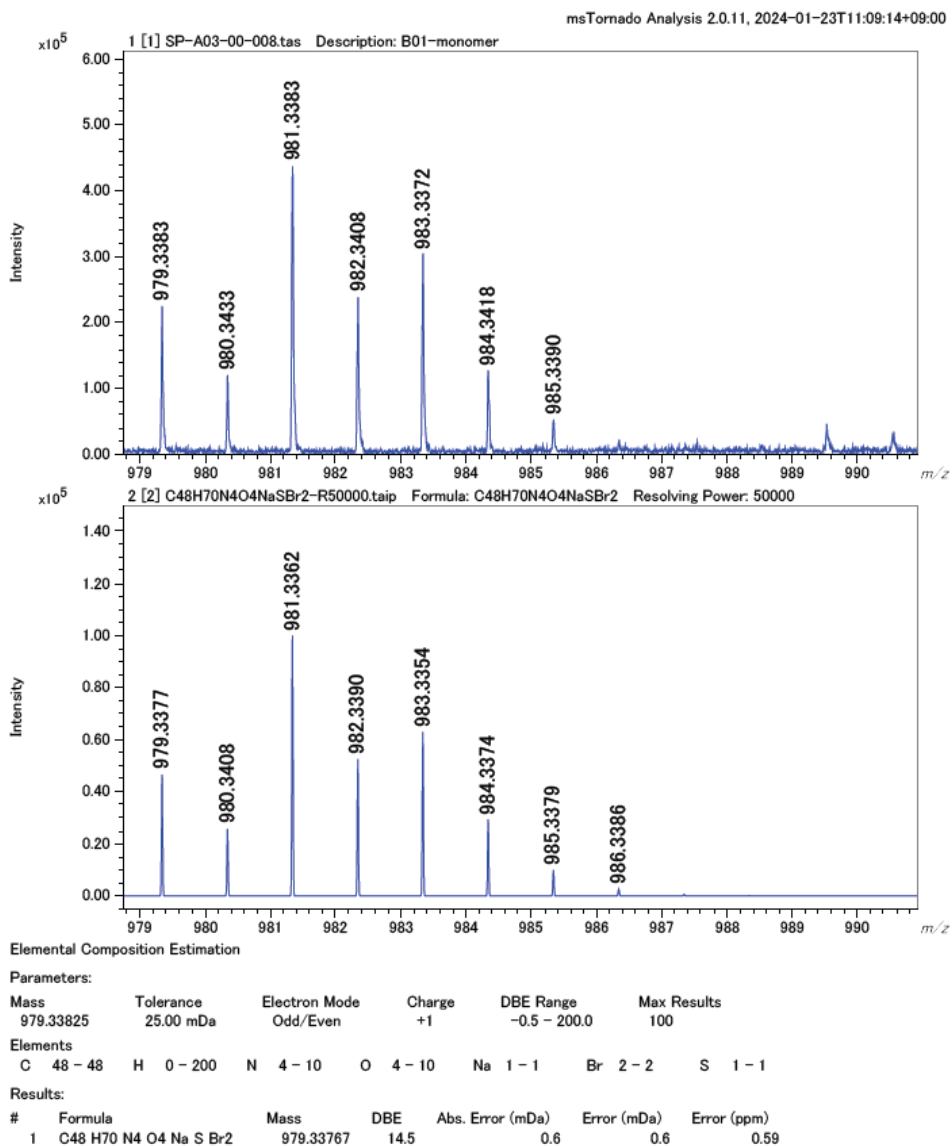

**Figure S22.** MALDI-TOF mass spectrum of **6-a**.



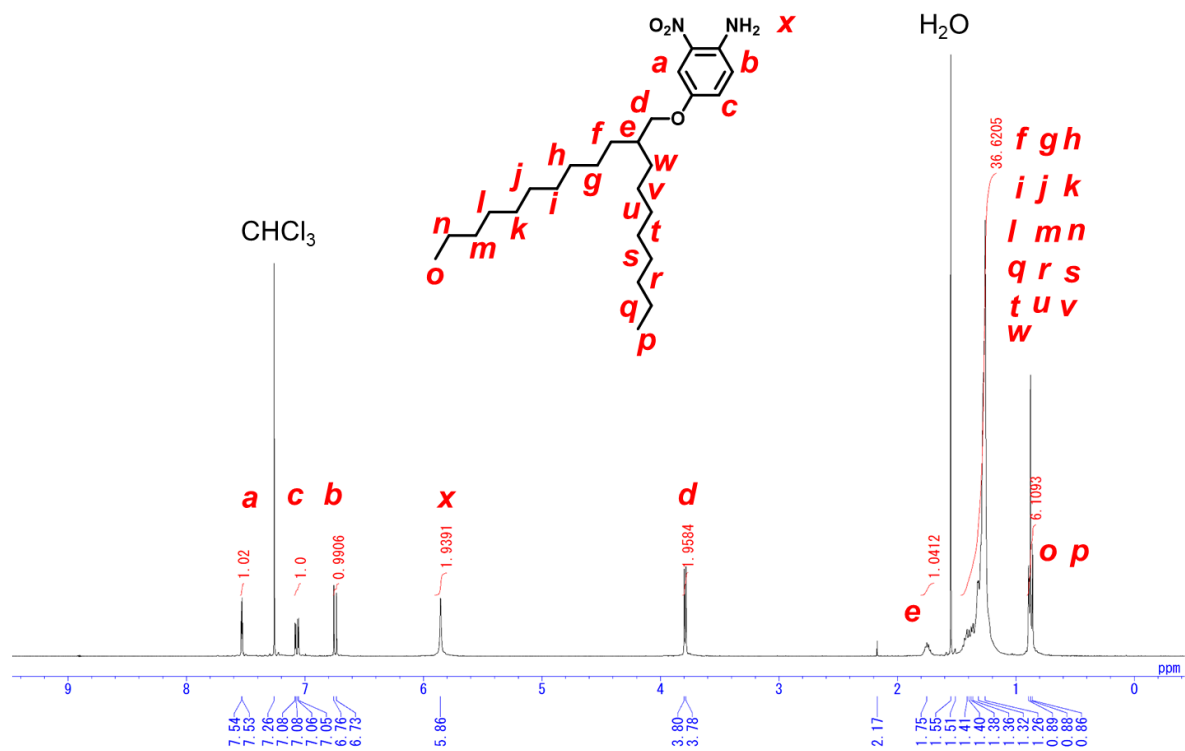

**Figure S23.** <sup>1</sup>H NMR spectrum of **1-b** (600 MHz, CDCl<sub>3</sub>).

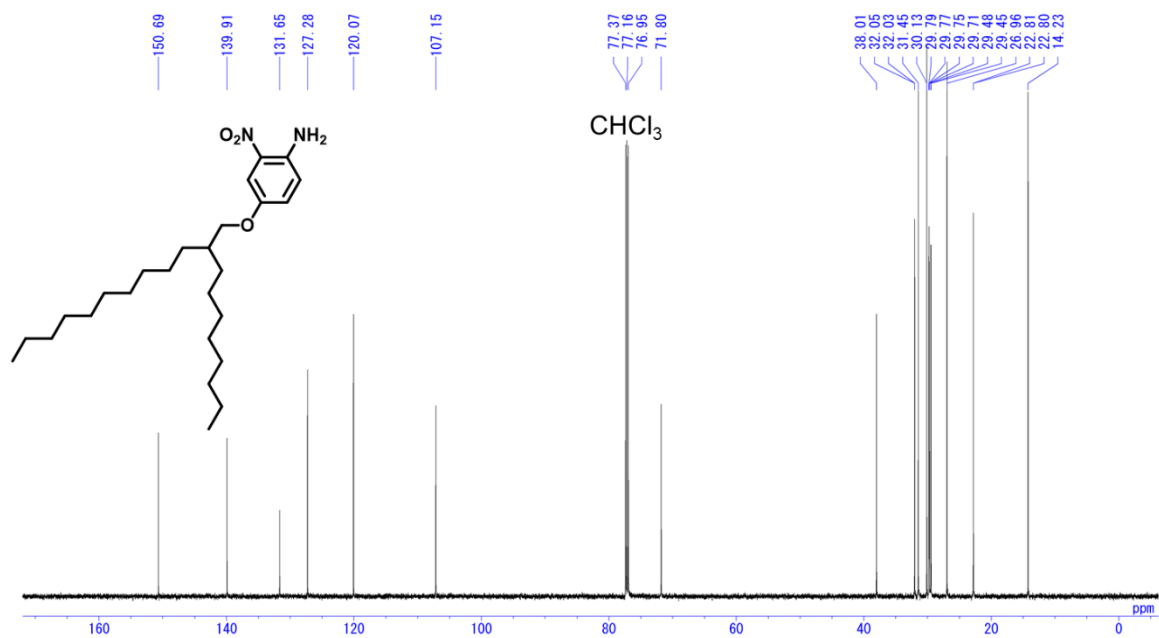

**Figure S24.** <sup>13</sup>C NMR spectrum of **1-b** (151 MHz, CDCl<sub>3</sub>).

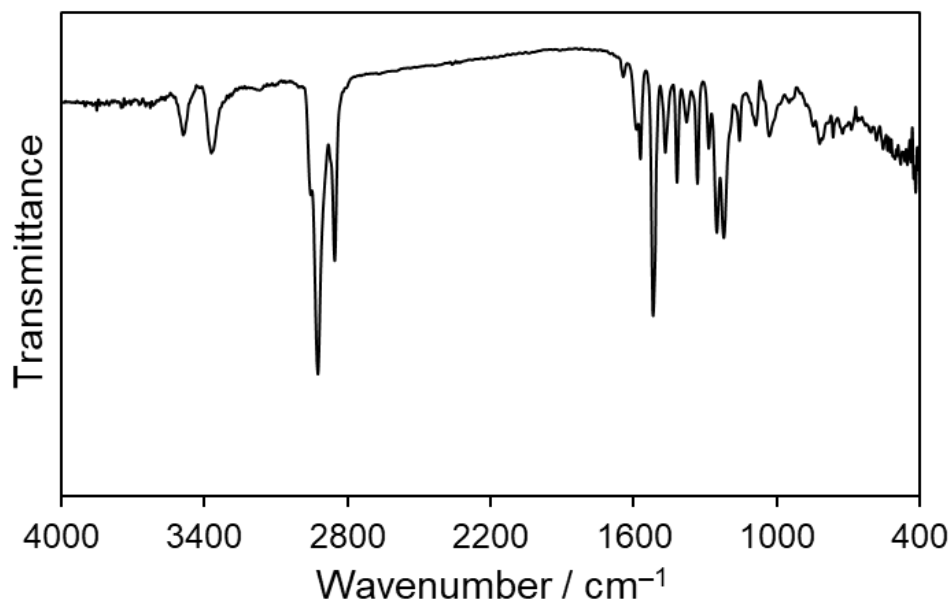

**Figure S25.** FT-IR spectrum of **1-b** (KBr).

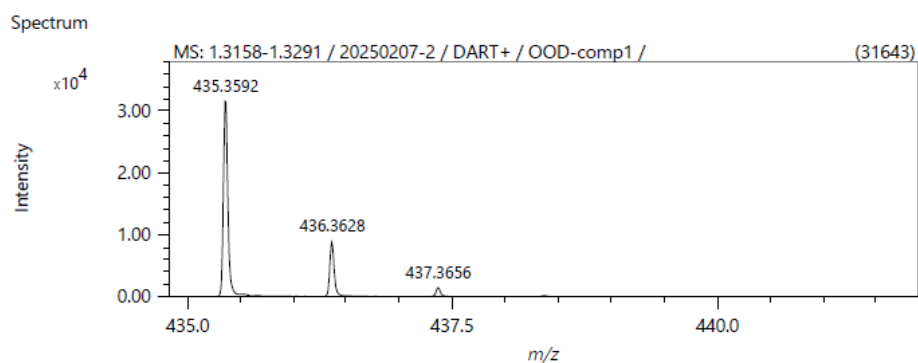

Isotope Pattern Simulation - C<sub>26</sub> H<sub>47</sub> N<sub>2</sub> O<sub>3</sub>

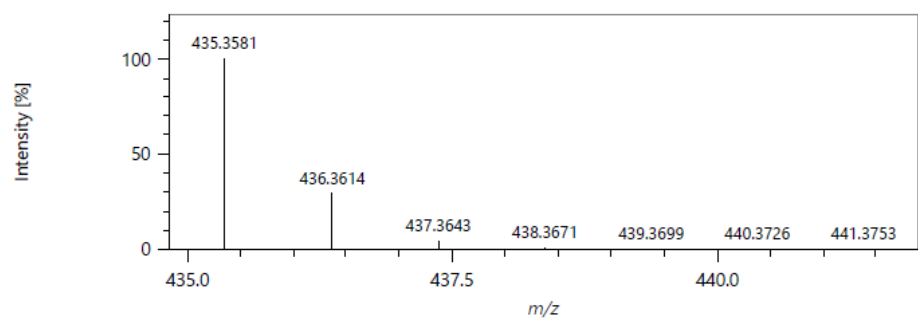

Elemental Composition

| Parameters |             | Elements Set 2: |    |     |   |   |    |
|------------|-------------|-----------------|----|-----|---|---|----|
| Tolerance: | 10.00 ppm   | Symbol          | C  | H   | N | O | Na |
| Electron:  | Odd/Even    | Min             | 0  | 0   | 0 | 0 | 0  |
| Charge:    | +1          | Max             | 30 | 100 | 2 | 4 | 0  |
| DBE:       | -1.5 - 60.0 |                 |    |     |   |   |    |

Results

| Mass      | Intensity | Formula                                                       | Calculated Mass | Mass Difference [mDa] | Mass Difference [ppm] | DBE |
|-----------|-----------|---------------------------------------------------------------|-----------------|-----------------------|-----------------------|-----|
| 435.35923 | 31642.86  | C <sub>26</sub> H <sub>47</sub> N <sub>2</sub> O <sub>3</sub> | 435.35812       | 1.11                  | 2.56                  | 4.5 |

**Figure S26.** DART+ mass spectrum of **1-b**.

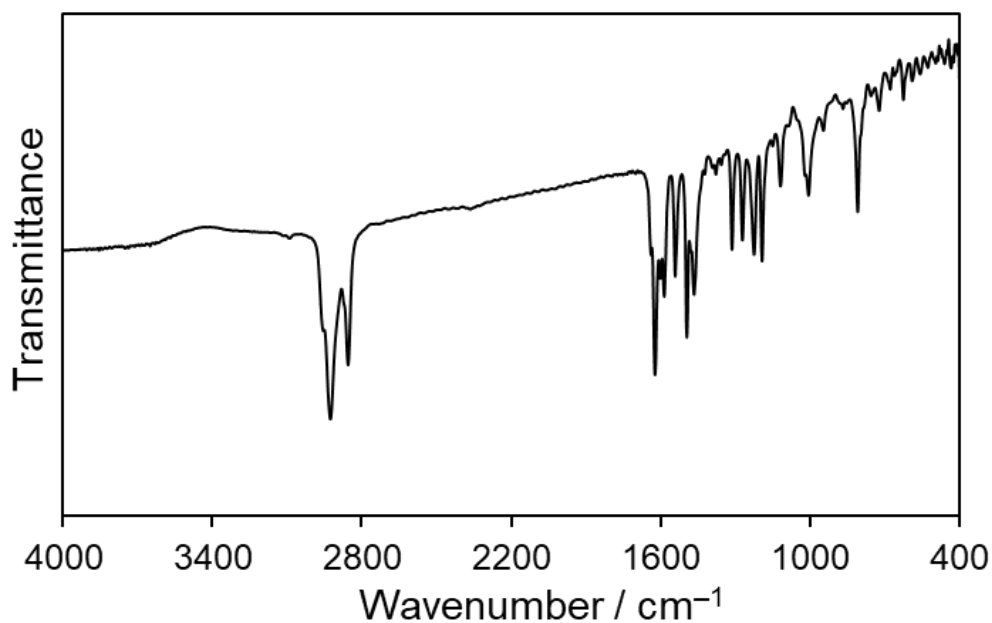

**Figure S27.** FT-IR spectrum of **2-b** (KBr).

[ Molecular Formula ]  
 Data : Saeki\_lab HR-068 Date : 27-Dec-2024 09:07  
 Instrument : JMS-700  
 Sample : OOD\_comp2  
 Inlet : Direct Ion Mode : EI+  
 RT : 1.30 min Molecular Formula : C<sub>26</sub>H<sub>44</sub>N<sub>2</sub>O<sub>3</sub>  
 Elements : C 80/0, H 100/0, N 2/0, O 3/0  
 Mass Tolerance : 10mmu  
 Unsaturation (U.S.) : -0.5 - 15.0

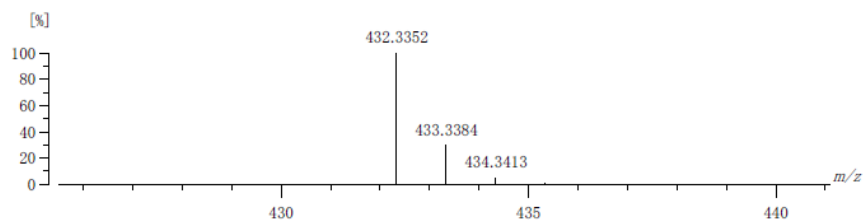

[ Mass Spectrum ]  
 Data : Saeki\_lab HR-068 Date : 27-Dec-2024 09:07  
 RT : 1.30 min Scan# : (40,51)

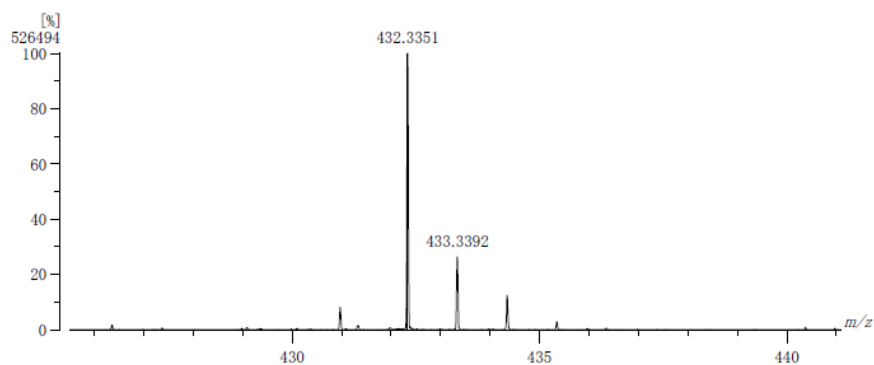

|   | Observed m/z | Int%   | Err[ppm / mmu] | U.S. Composition                                                  |
|---|--------------|--------|----------------|-------------------------------------------------------------------|
| 1 | 432.3351     | 100.00 | -9.5 / -4.1    | 10.0 C <sub>31</sub> H <sub>44</sub> O                            |
| 2 |              |        | +19.6 / +8.5   | 10.5 C <sub>30</sub> H <sub>42</sub> N O                          |
| 3 |              |        | -0.2 / -0.1    | 6.0 C <sub>26</sub> H <sub>44</sub> N <sub>2</sub> O <sub>3</sub> |

**Figure S28.** EI+ mass spectrum of **2-b**.

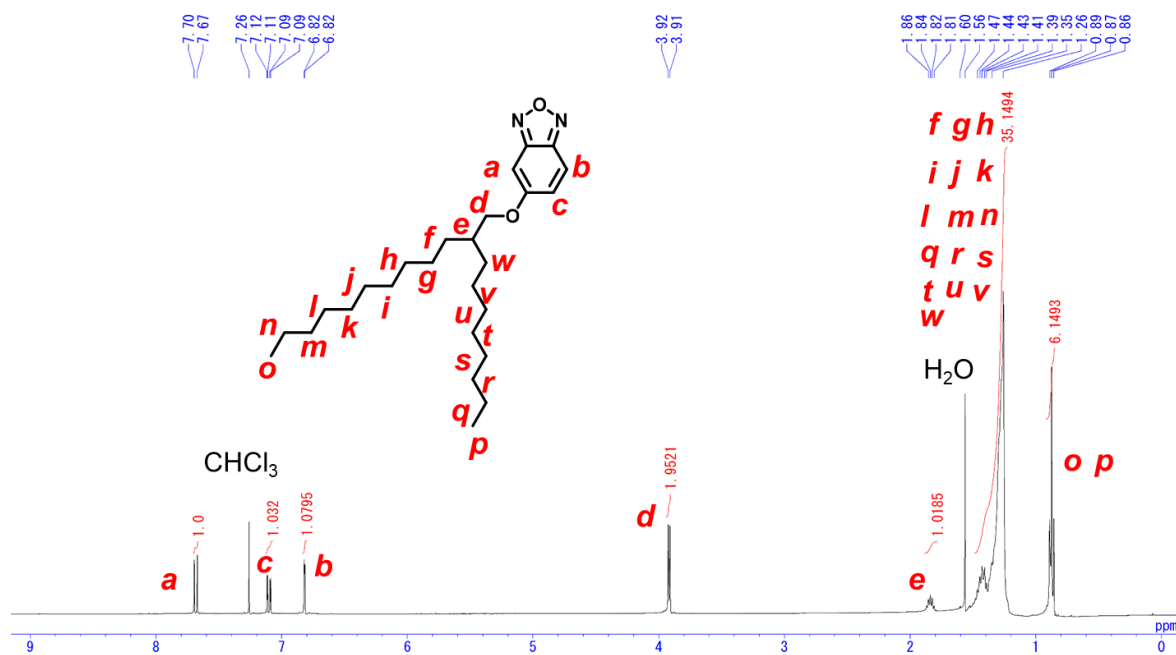

**Figure S29.**  $^1\text{H}$  NMR spectrum of **3-b** (400 MHz,  $\text{CDCl}_3$ ).

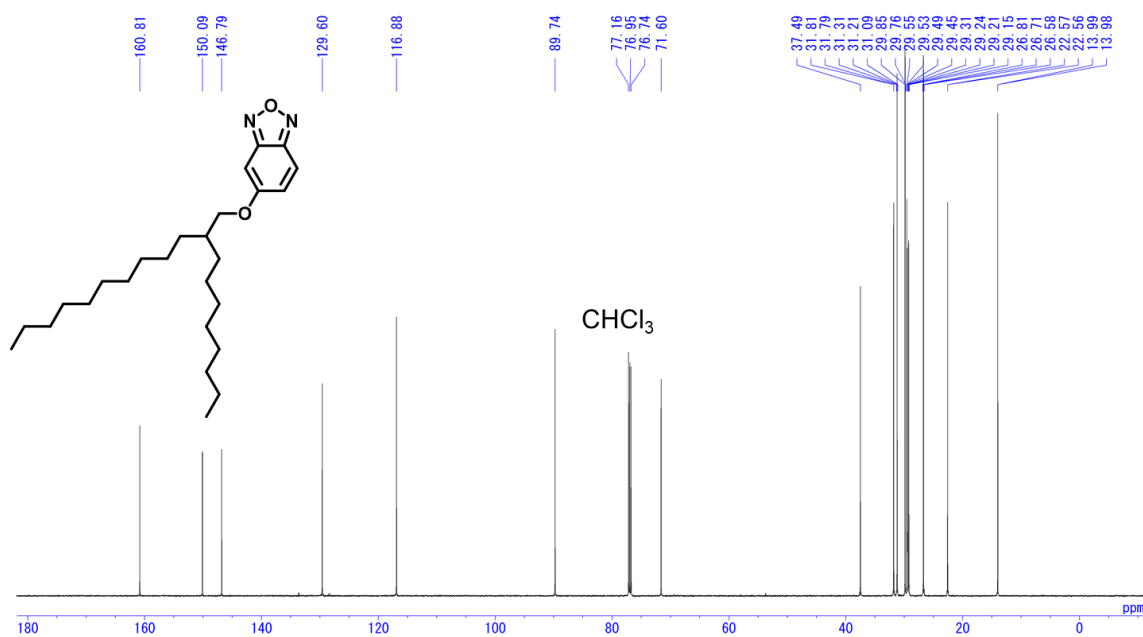

**Figure S30.**  $^{13}\text{C}$  NMR spectrum of **3-b** (151 MHz,  $\text{CDCl}_3$ ).

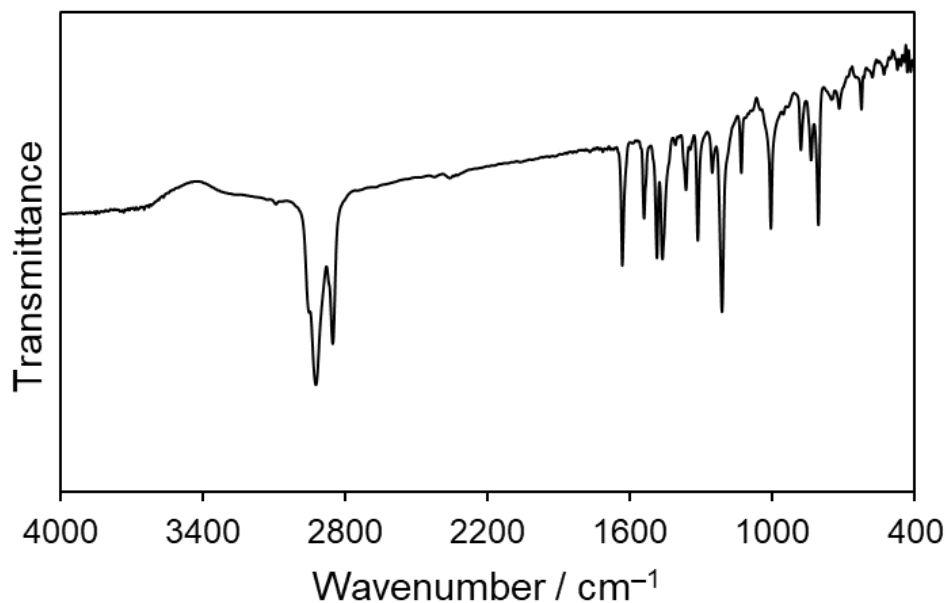

**Figure S31.** FT-IR spectrum of **3-b** (KBr).

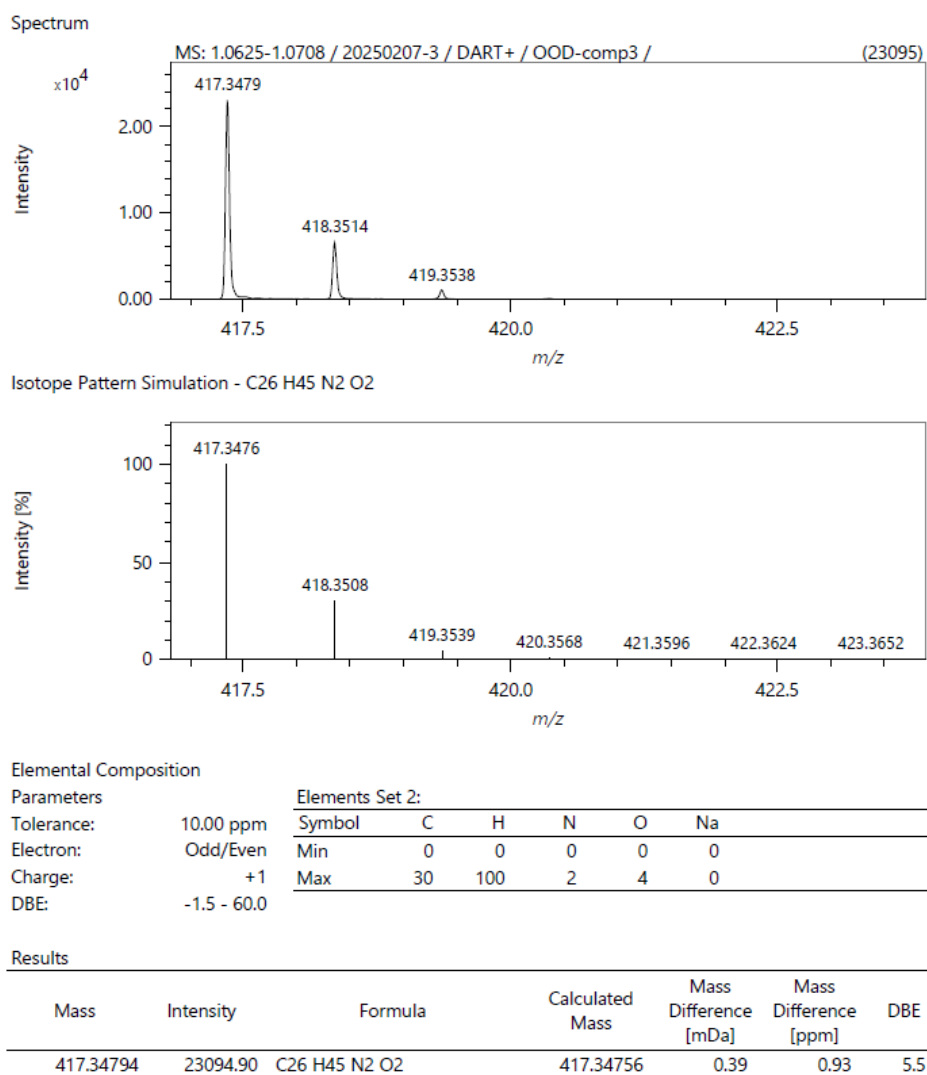

**Figure S32.** DART+ mass spectrum of **3-b**.



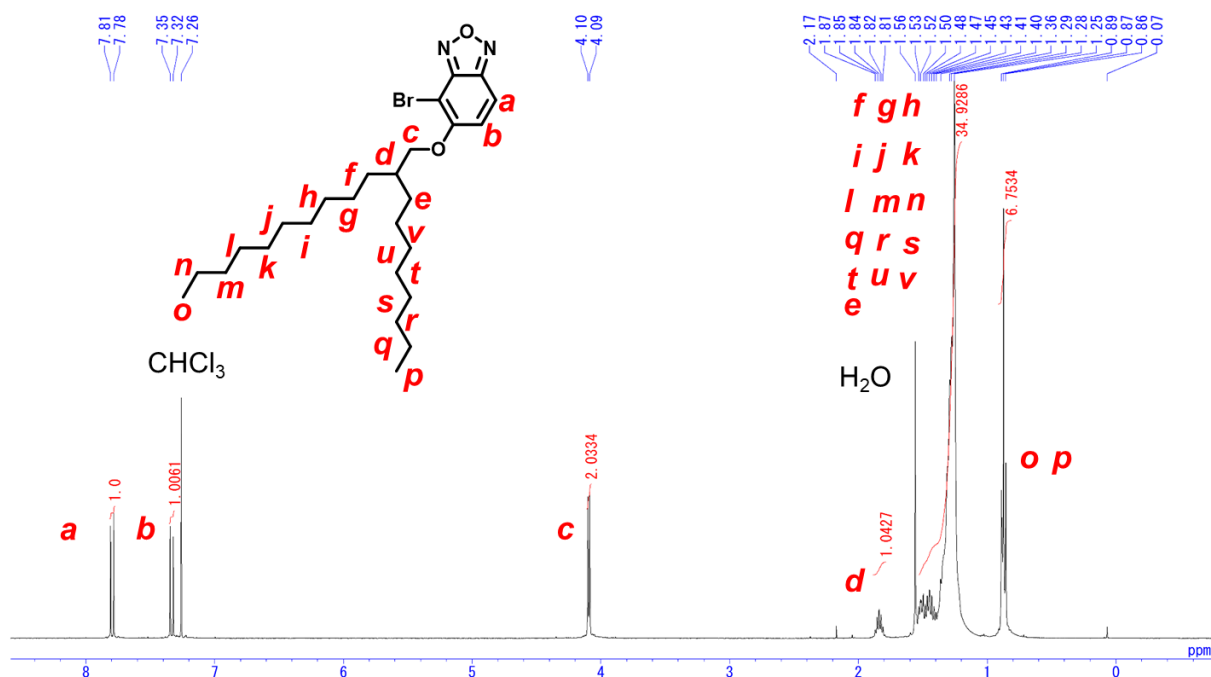

**Figure S33.** <sup>1</sup>H NMR spectrum of **4-b** (400 MHz, CDCl<sub>3</sub>).

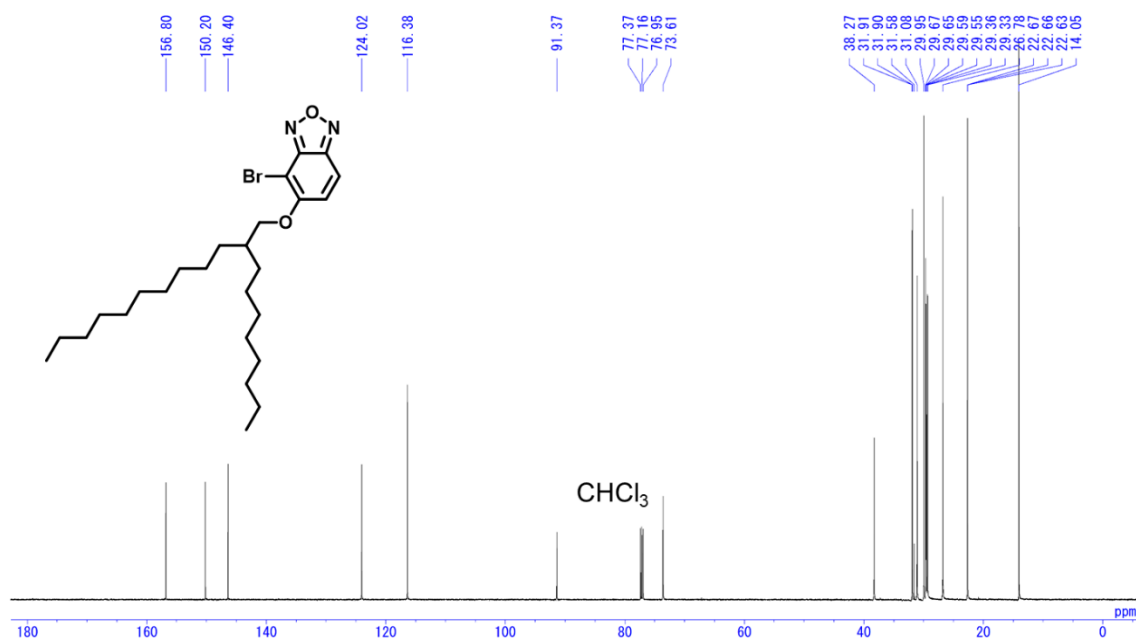

**Figure S34.** <sup>13</sup>C NMR spectrum of **4-b** (151 MHz, CDCl<sub>3</sub>).

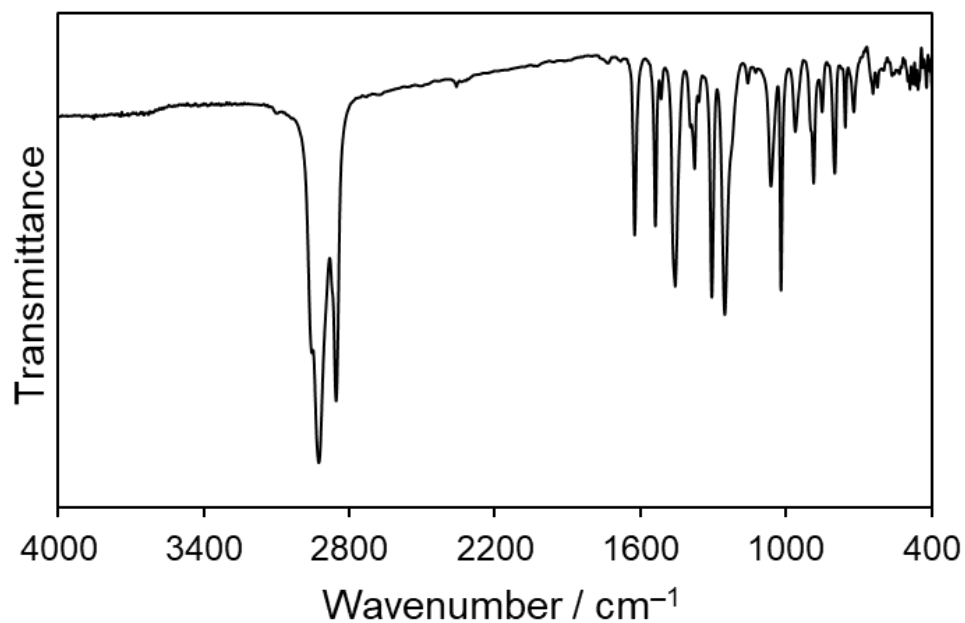

**Figure S35.** FT-IR spectrum of **4-b** (KBr).

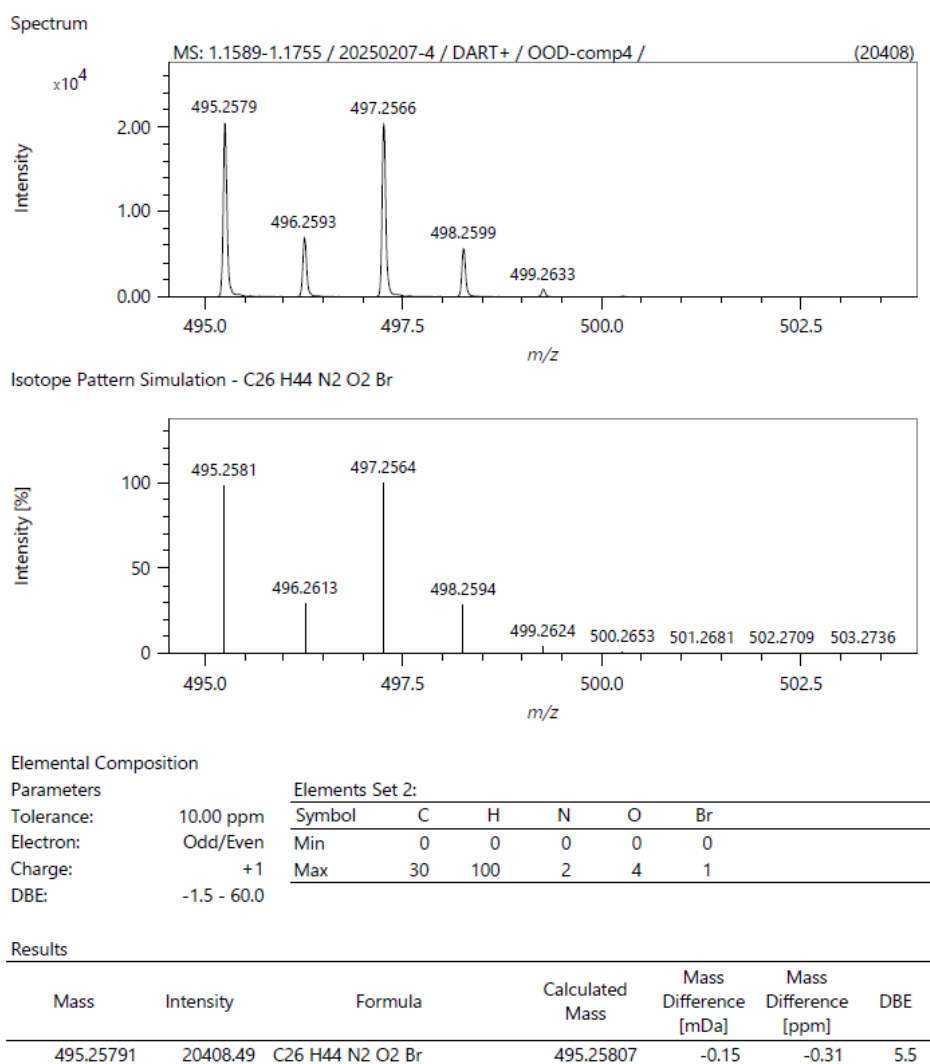

**Figure S36.** DART+ mass spectrum of **4-b**.

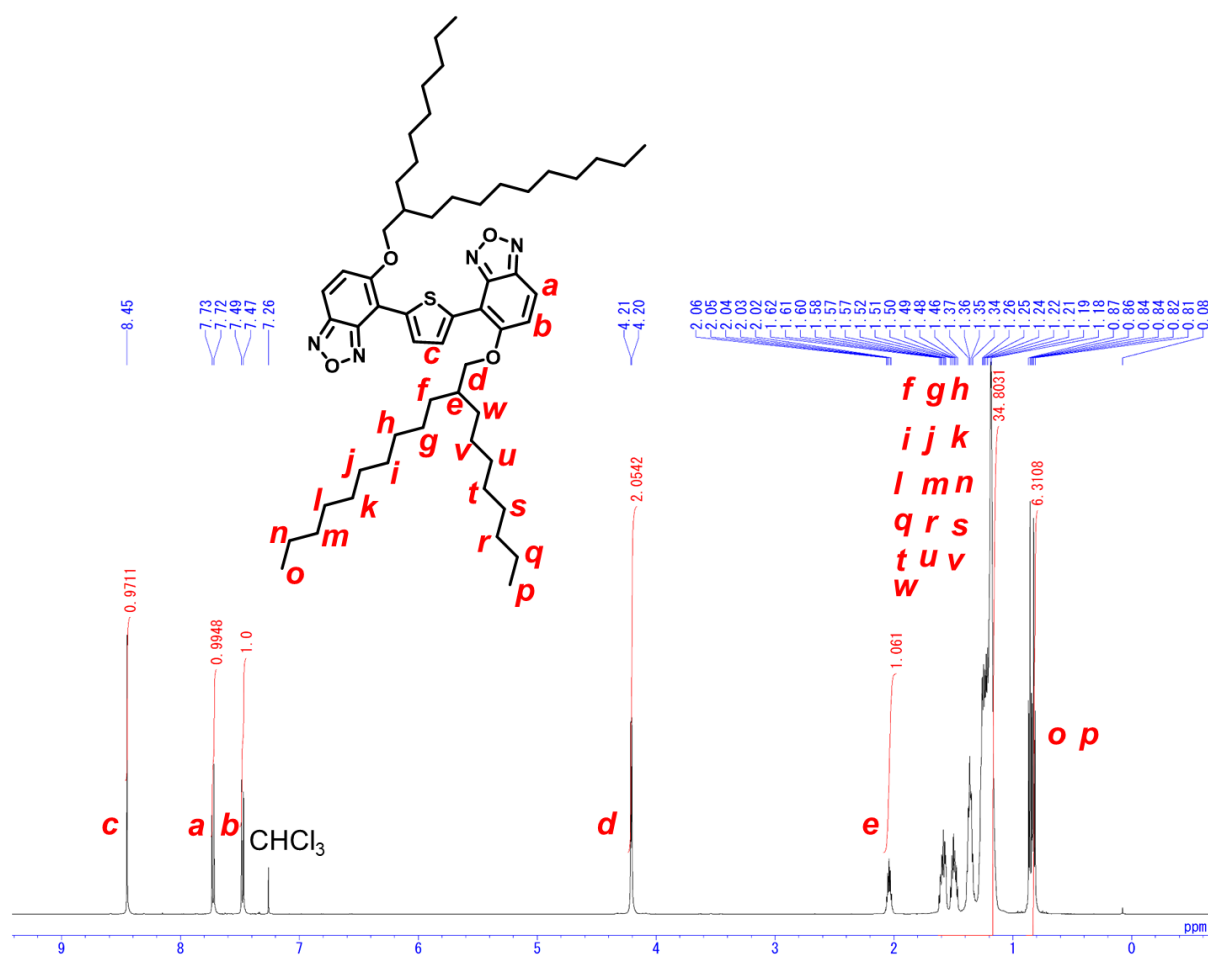

Figure S37. <sup>1</sup>H NMR spectrum of **5-b** (400 MHz, CDCl<sub>3</sub>).

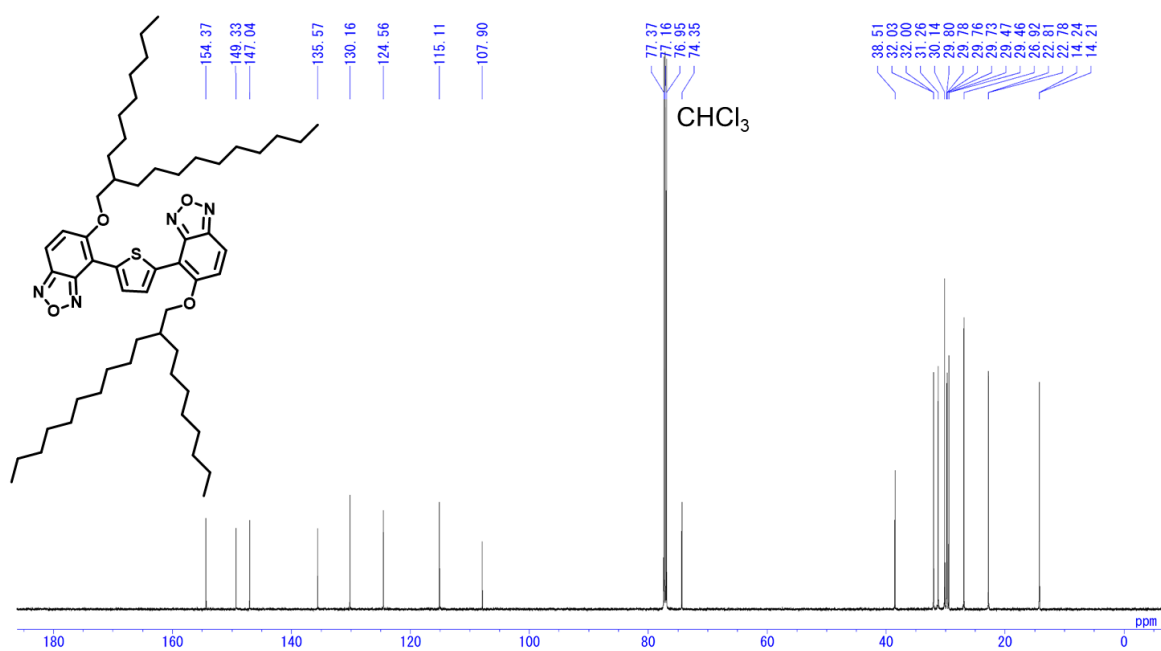

Figure S38. <sup>13</sup>C NMR spectrum of **5-b** (151 MHz, CDCl<sub>3</sub>).

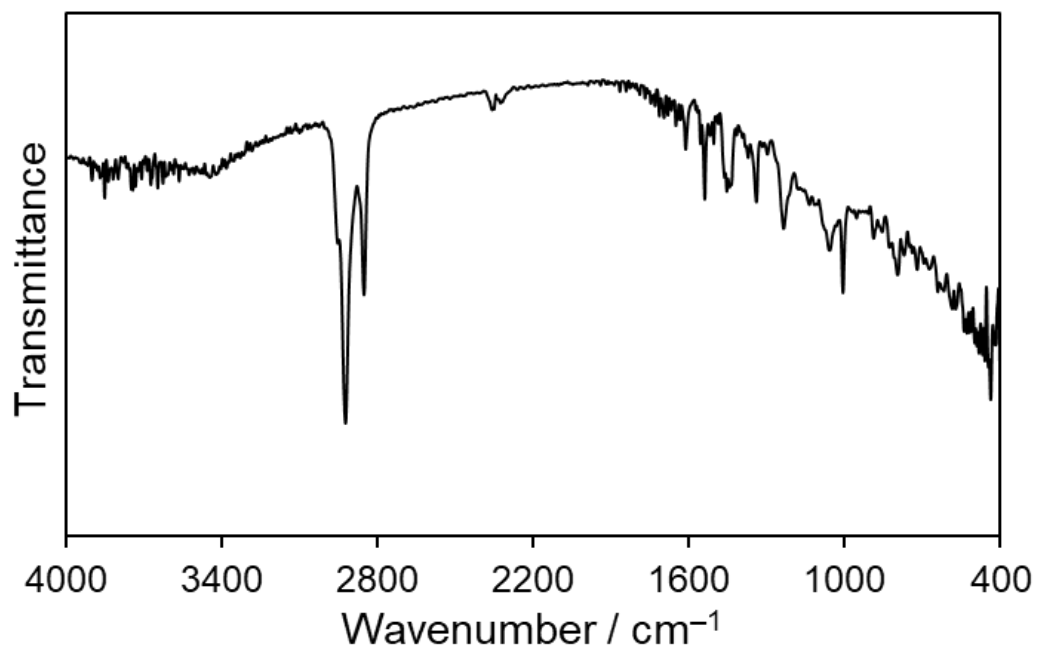

**Figure S39.** FT-IR spectrum of **5-b** (KBr).

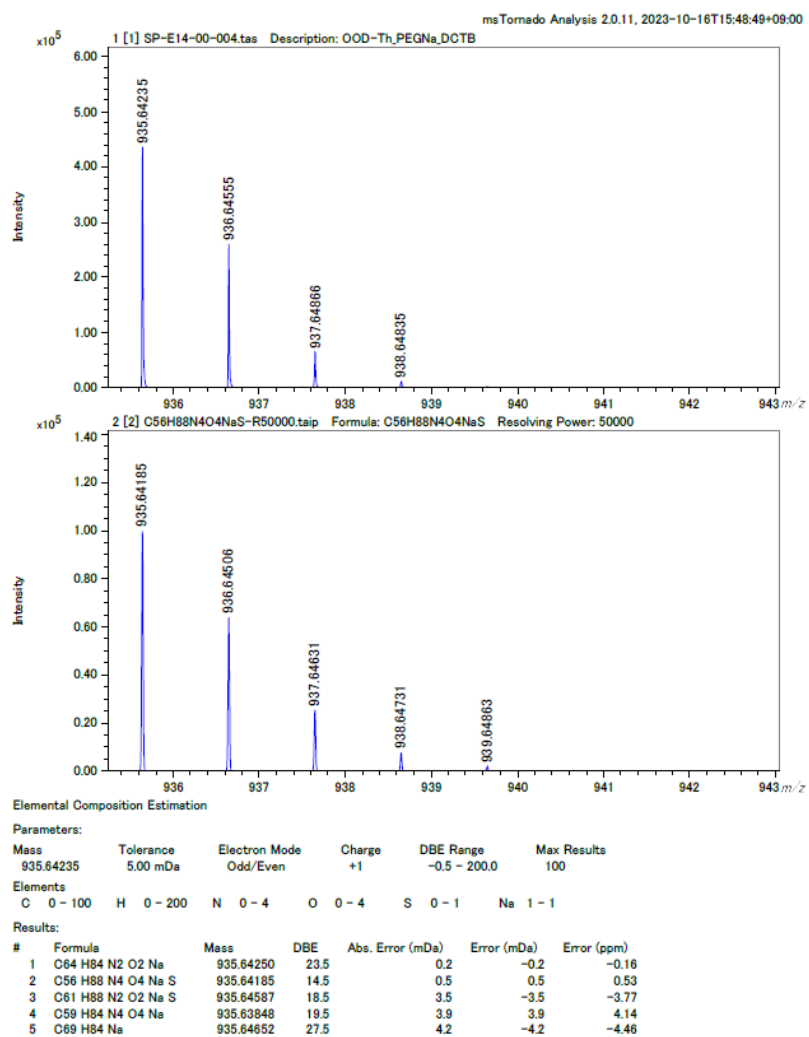

**Figure S40.** MALDI-TOF mass spectrum of **5-b**.

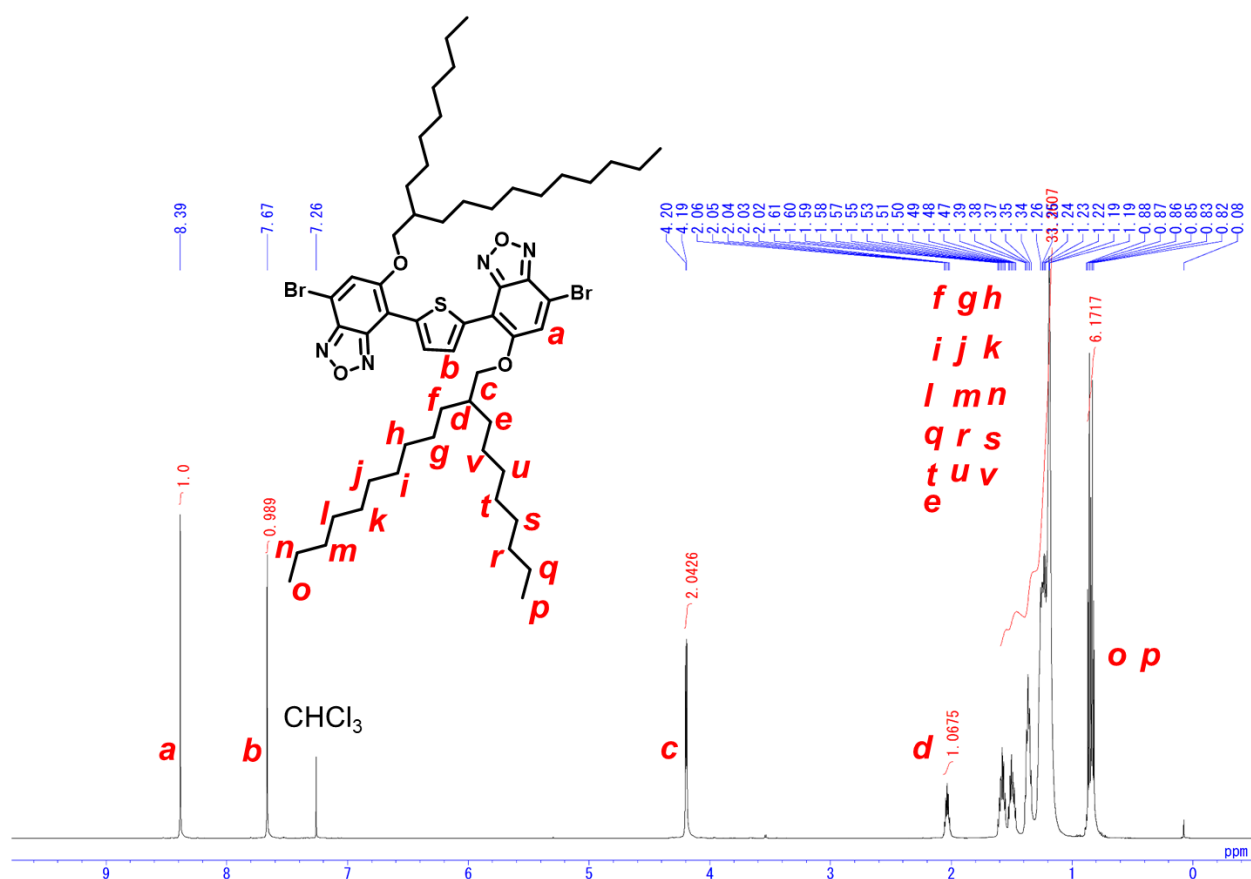

**Figure S41.** <sup>1</sup>H NMR spectrum of **6-b** (600 MHz, CDCl<sub>3</sub>).

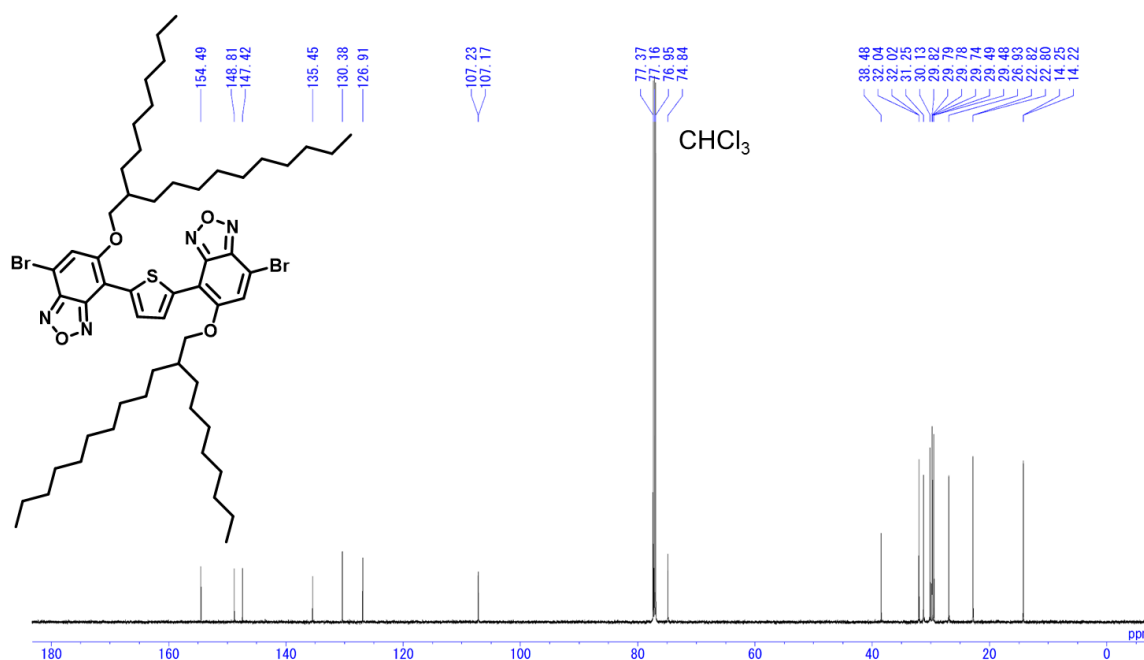

**Figure S42.** <sup>13</sup>C NMR spectrum of **6-b** (151 MHz, CDCl<sub>3</sub>).

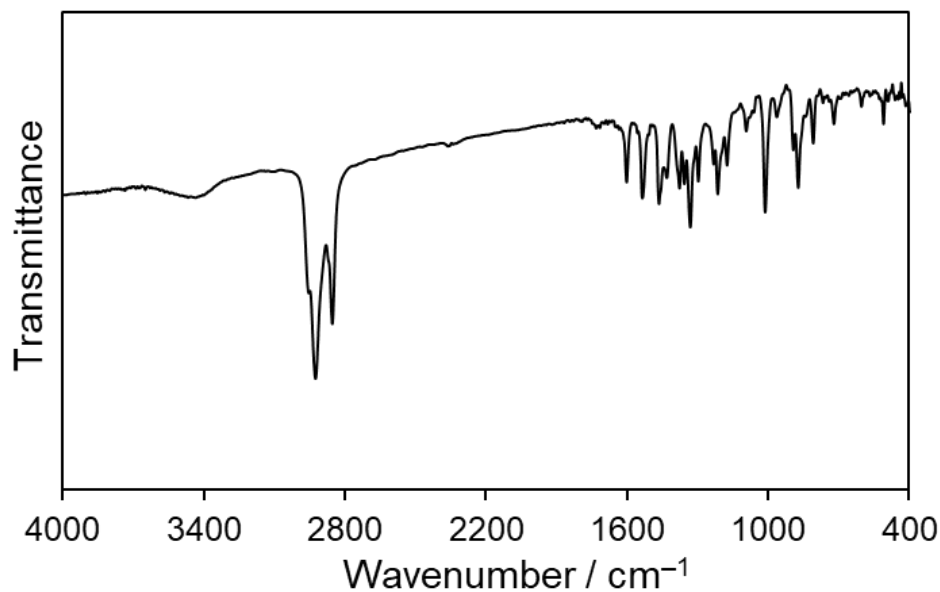

**Figure S43.** FT-IR spectrum of **6-b** (KBr).

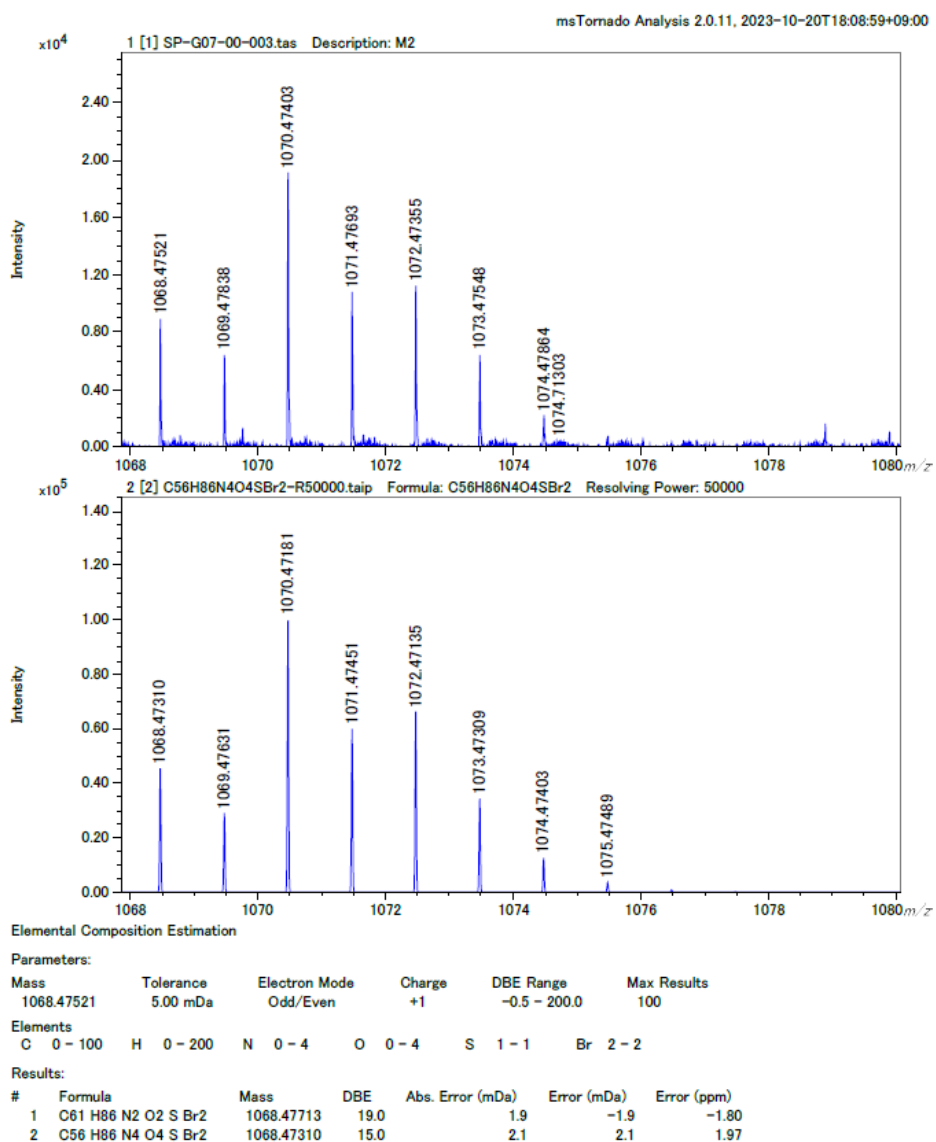

**Figure S44.** MALDI-TOF mass spectrum of **6-b**.

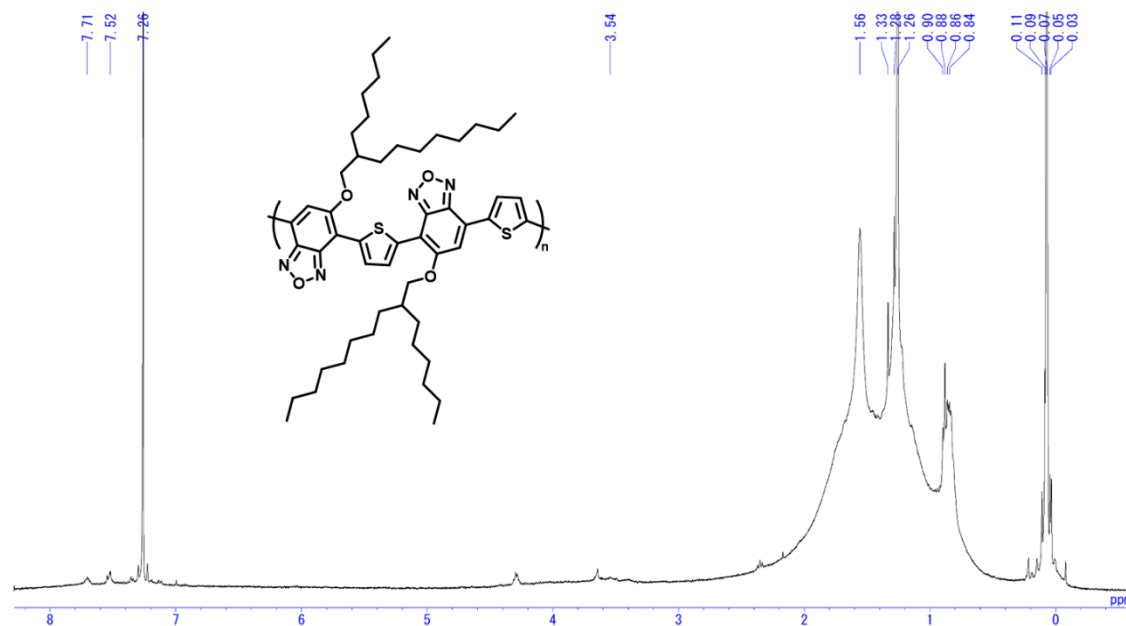

**Figure S45.** <sup>1</sup>H NMR spectrum of **BO1** (600 MHz, CDCl<sub>3</sub>).

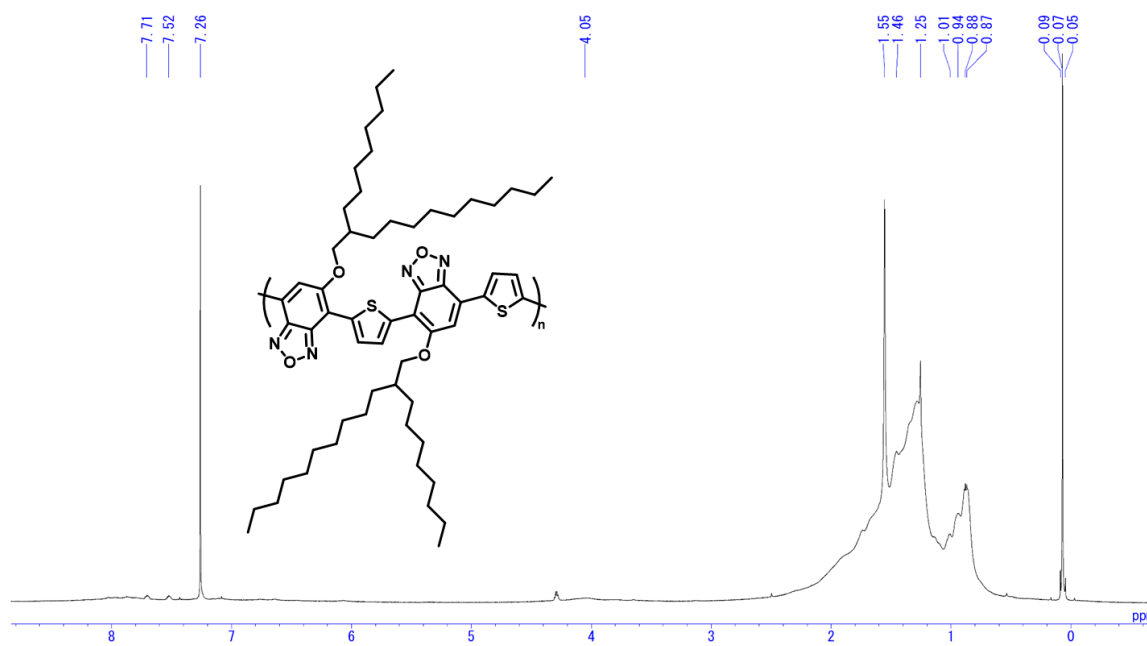

**Figure S46.** <sup>1</sup>H NMR spectrum of **BO2** (600 MHz, CDCl<sub>3</sub>).

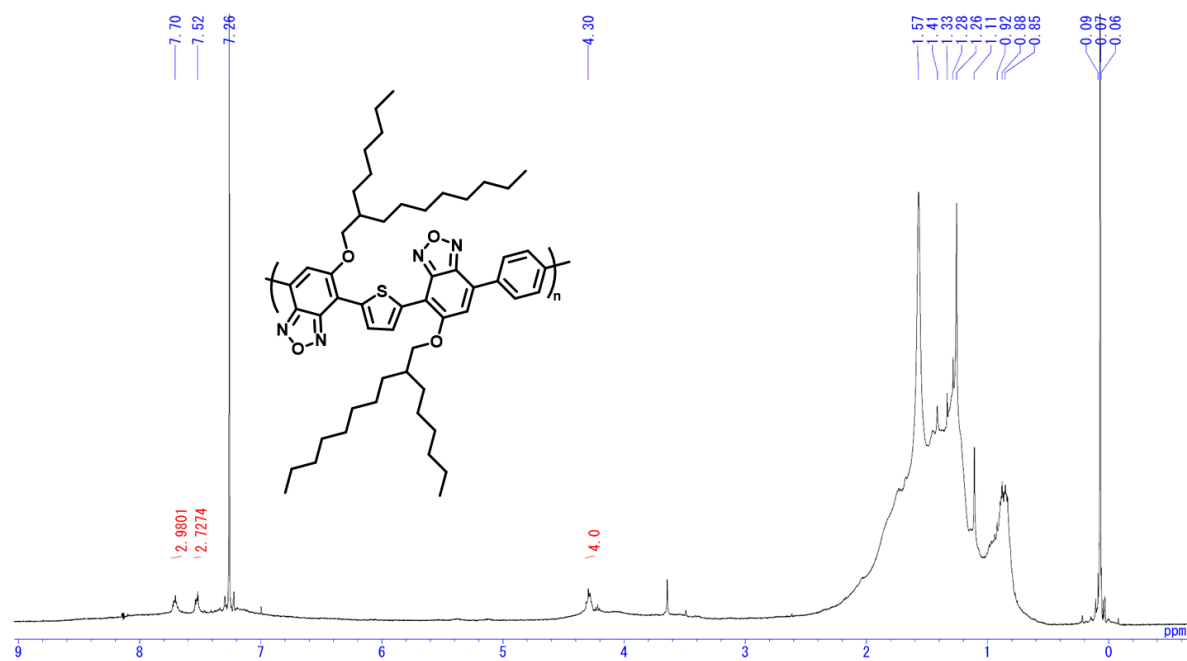

**Figure S47.** <sup>1</sup>H NMR spectrum of **BO1Ph** (600 MHz, CDCl<sub>3</sub>).



## 2. Supporting Tables

**Table S1.** Molecular weight and  $M_w/M_n$  of BO2 and BO1Ph. <sup>[a]</sup>

| Polymer | $M_n$ [kDa] | $M_w$ [kDa] | $M_w/M_n$ |
|---------|-------------|-------------|-----------|
| BO1     | NA          | NA          | NA        |
| BO2     | 32.7        | 62.1        | 1.9       |
| BO1Ph   | 31.5        | 81.9        | 2.6       |

<sup>[a]</sup> SEC measurements in chloroform at 40 °C. BO1 was not available due to its low solubility.

**Table S2.** Summary of TRMC analysis.

| BHJ        | $\phi\sum\mu$<br>[ $\times 10^{-4} \text{ cm}^2 \text{ V}^{-1} \text{ s}^{-1}$ ] | $\tau_1$ [ $\mu\text{s}$ ]<br>(intensity [%]) | $\tau_2$ [ $\mu\text{s}$ ]<br>(intensity [%]) | $\tau_{ave}^{[a]}$ [ $\mu\text{s}$ ] |
|------------|----------------------------------------------------------------------------------|-----------------------------------------------|-----------------------------------------------|--------------------------------------|
| BO1 : Y6   | 8.16                                                                             | 0.218 (99.0)                                  | 6.63 (1.00)                                   | 0.794                                |
| BO2 : Y6   | 2.03                                                                             | 0.457 (69.3)                                  | 13.5 (30.7)                                   | 3.51                                 |
| BO1Ph : Y6 | 1.56                                                                             | 0.658 (62.0)                                  | 15.1 (38.0)                                   | 4.63                                 |

<sup>[a]</sup> Average lifetime =  $(A_1\tau_1 + A_2\tau_2)/(A_1 + A_2)^{-1}$

**Table S3.** Summary of contact angle measurements. <sup>[a]</sup>

| Polymer / NFA     | Contact Angle [°] |          | $\gamma_d$            | $\gamma_p$            | $\gamma$              |
|-------------------|-------------------|----------|-----------------------|-----------------------|-----------------------|
|                   | Water             | Glycerol | [mJ m <sup>-2</sup> ] | [mJ m <sup>-2</sup> ] | [mJ m <sup>-2</sup> ] |
| BO1               | 90.9              | 83.6     | 12.0                  | 7.61                  | 19.6                  |
| BO2               | 104.4             | 89.6     | 20.2                  | 0.79                  | 21.0                  |
| BO1Ph             | 100.8             | 85.8     | 22.0                  | 1.17                  | 23.1                  |
| Y6 <sup>[b]</sup> | 106.8             | 94.9     | 14.5                  | 1.29                  | 15.8                  |

<sup>[a]</sup>  $\gamma_d$ : dispersion component of surface free energy,  $\gamma_p$ : polar component of surface free energy,  $\gamma$ : total surface free energy. <sup>[b]</sup> Taken from a reference. K. Kranthiraja, A. Saeki, *ACS Appl. Mater. Interfaces* **2022**, *14*, 28936.

**Table S4.** Summary of hole and electron mobilities of BHJ.

| Polymer :<br>NFA | $\mu_h$<br>[cm <sup>2</sup> V <sup>-1</sup> s <sup>-1</sup> ] | $\mu_e$<br>[cm <sup>2</sup> V <sup>-1</sup> s <sup>-1</sup> ] | $\mu_e/\mu_h$ | $L$ of HOD <sup>[a]</sup><br>[nm] | $L$ of EOD <sup>[a]</sup><br>[nm] |
|------------------|---------------------------------------------------------------|---------------------------------------------------------------|---------------|-----------------------------------|-----------------------------------|
| BO1 : Y6         | $9.1 \times 10^{-5}$                                          | $8.6 \times 10^{-4}$                                          | 9.5           | $81 \pm 8$                        | $102 \pm 7$                       |
| BO2 : Y6         | $2.9 \times 10^{-5}$                                          | $1.6 \times 10^{-4}$                                          | 5.5           | $92 \pm 3$                        | $176 \pm 14$                      |
| BO1Ph : Y6       | $2.2 \times 10^{-4}$                                          | $1.4 \times 10^{-5}$                                          | 0.061         | $104 \pm 11$                      | $58 \pm 8$                        |

<sup>[a]</sup> Thickness ( $L$ ) of hole-only device (HOD) and electron-only device (EOD).

### 3. Supporting Schemes

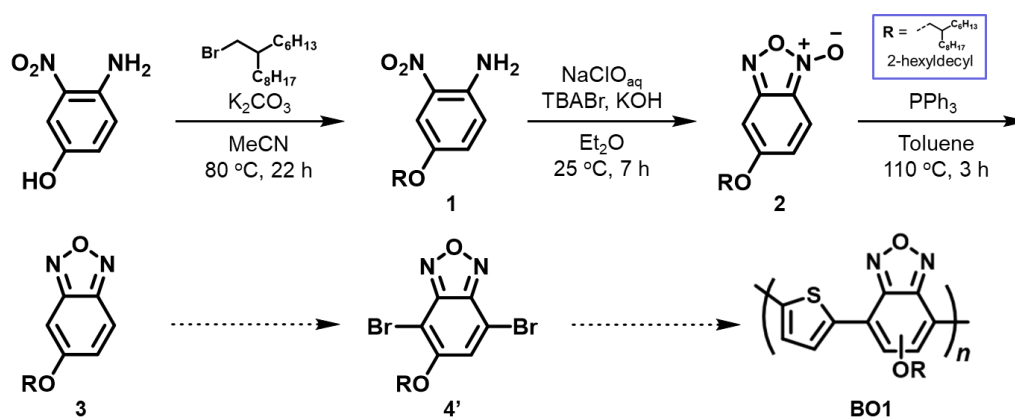

**Scheme S1.** Initial synthesis route of BO1.

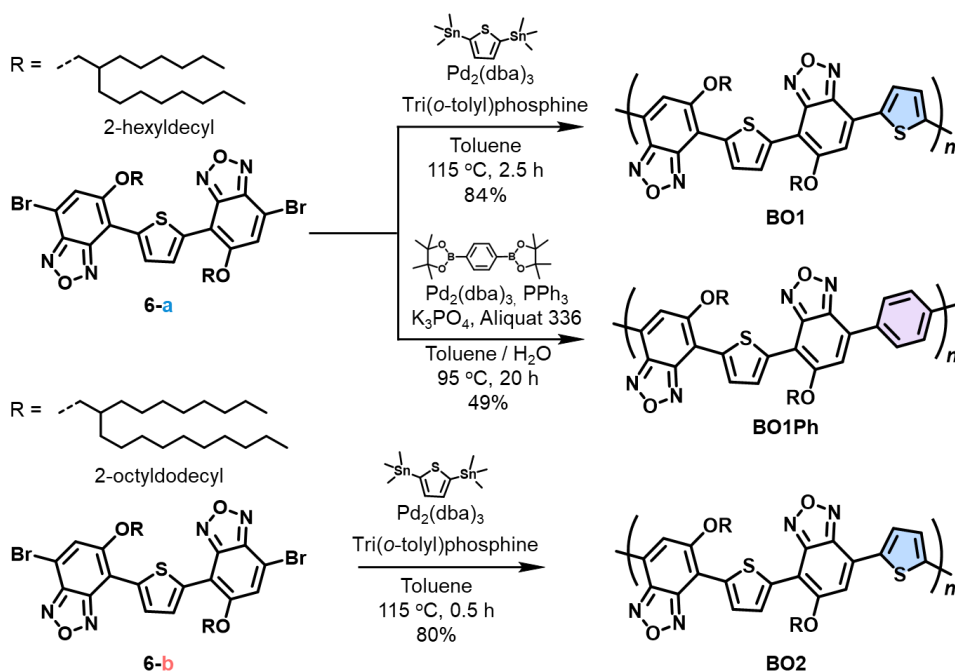

**Scheme S2.** Synthesis route of BO1, BO2 and BO1Ph.

#### 4. Supporting Figures

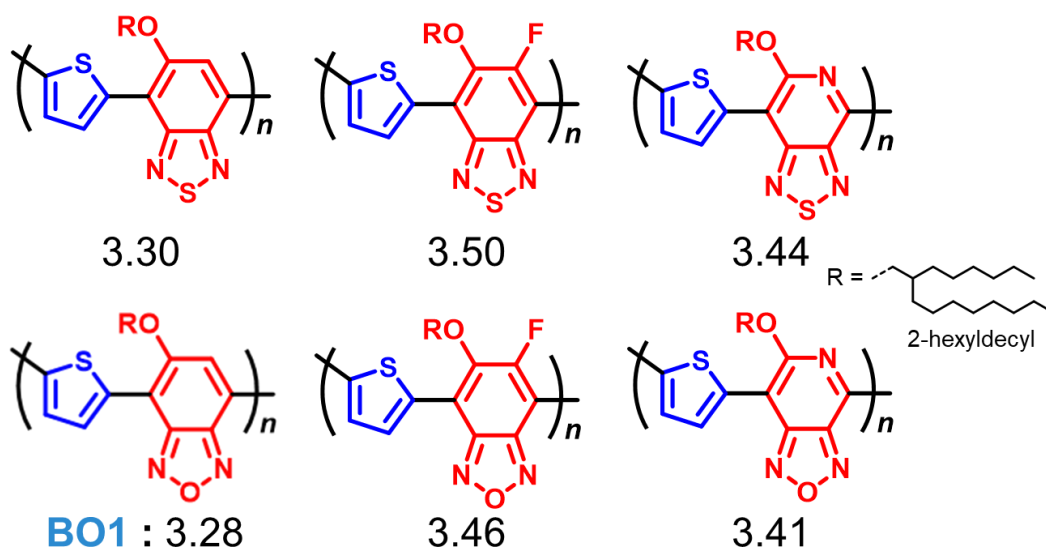

**Figure S48.** Chemical structure and SA score of candidate compounds.

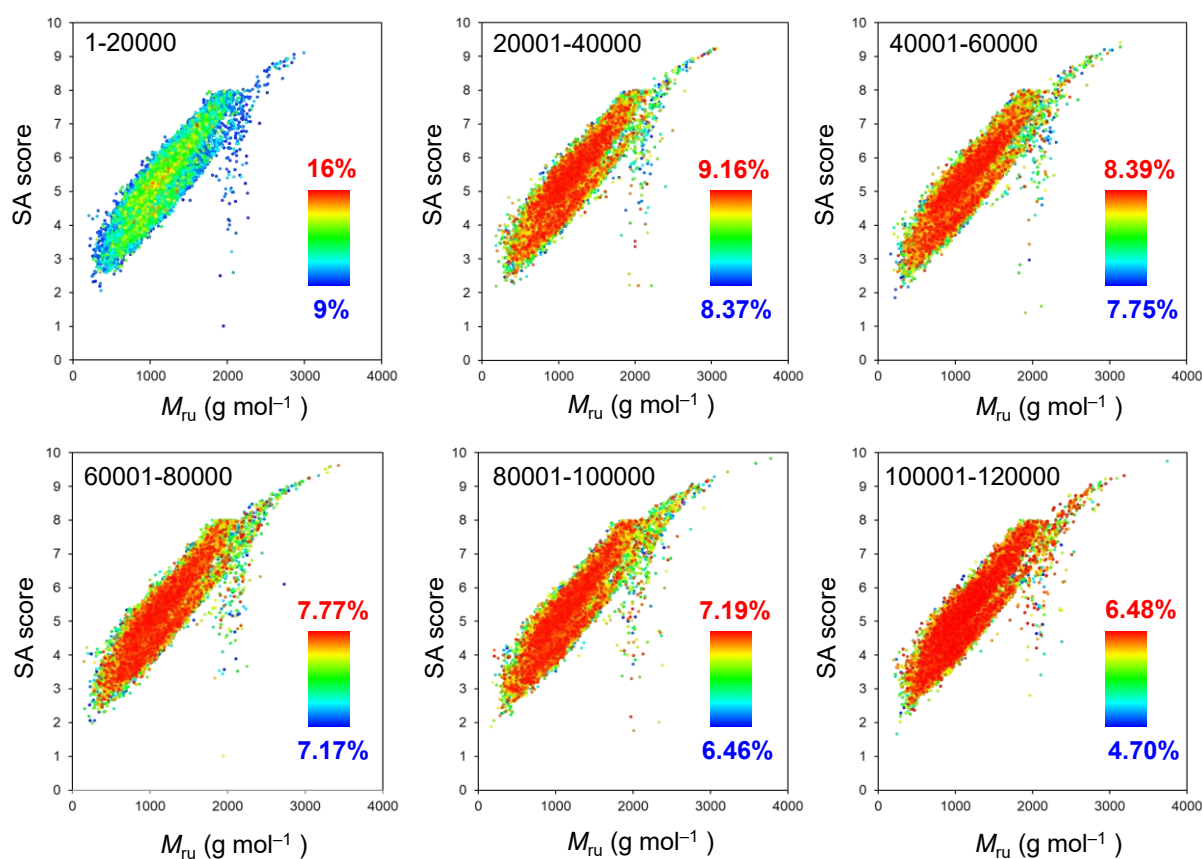

**Figure S49.** Synthetic accessibility (SA) score vs molecular weight of repeating unit ( $M_{ru}$ ) of virtually generated polymers. The color represents ML-predicted PCE of polymers when they are combined with Y6. The panel from left top to right bottom are the polymers sorted by predicted PCE (e.g. 1-20000 is the ranking in PCE).

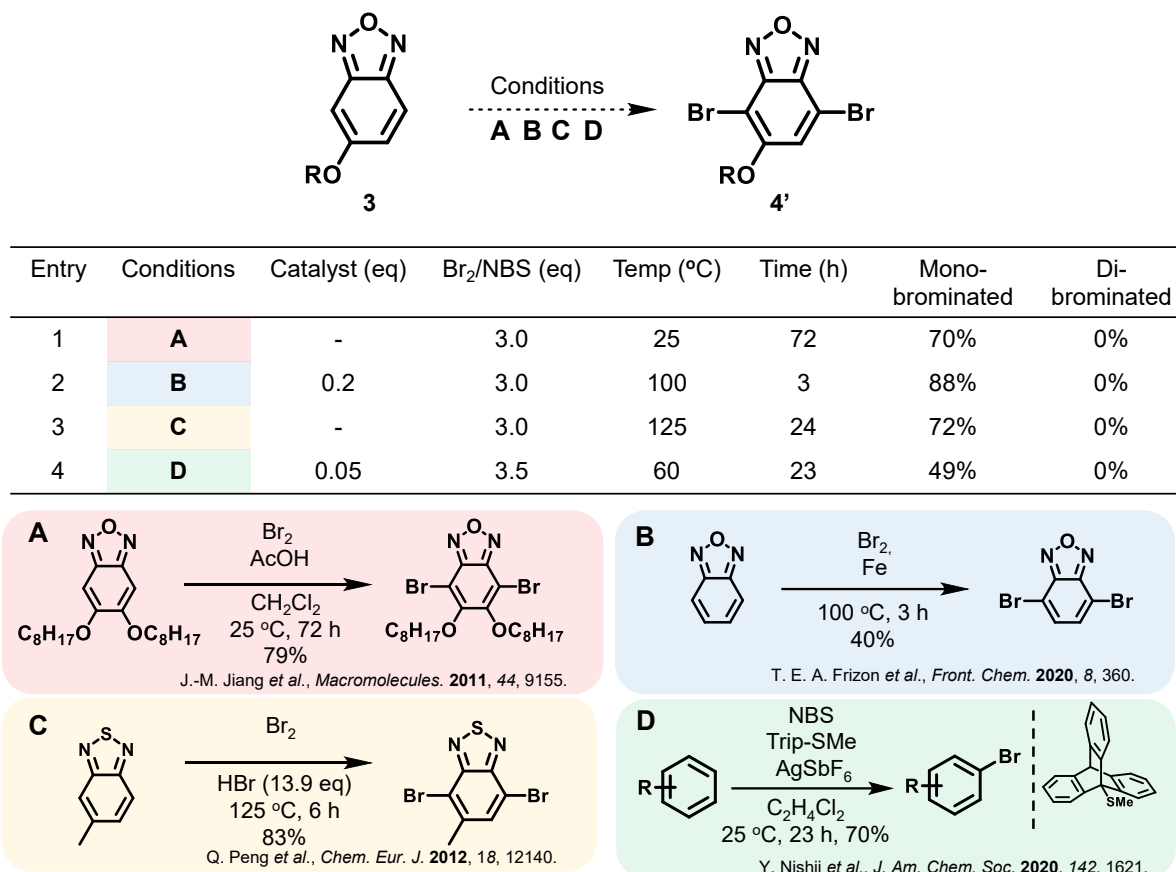

**Figure S50.** Bromination condition of **3**. All the reaction schema were unsuccessful (mostly mono brominated compound was obtained).

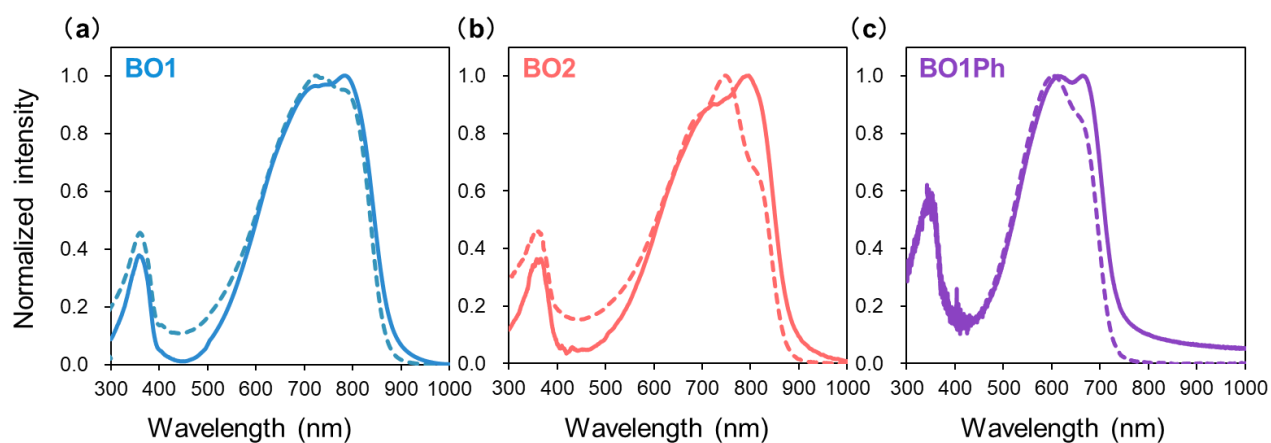

**Figure S51.** UV-Vis absorption spectra of polymers in the thin film (solid line) and chloroform solution (40  $\mu\text{g mL}^{-1}$ , dotted line) (a) BO1, (b) BO2, and (c) BO1Ph.

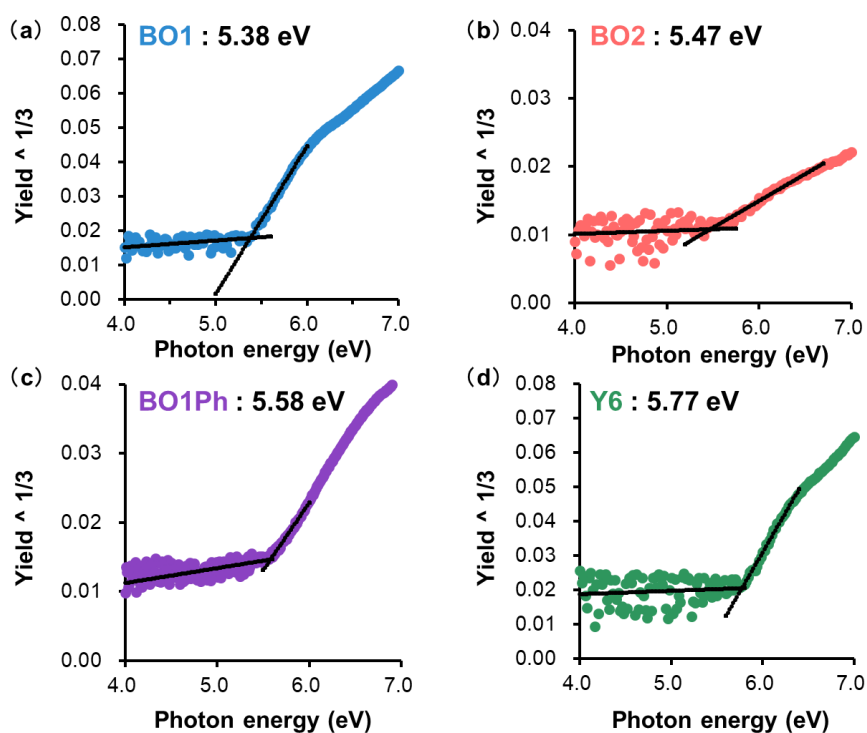

**Figure S52.** PYS data of polymers and Y6 in the thin film of (a) BO1, (b) BO2, (c) BO1Ph, and (d) Y6.

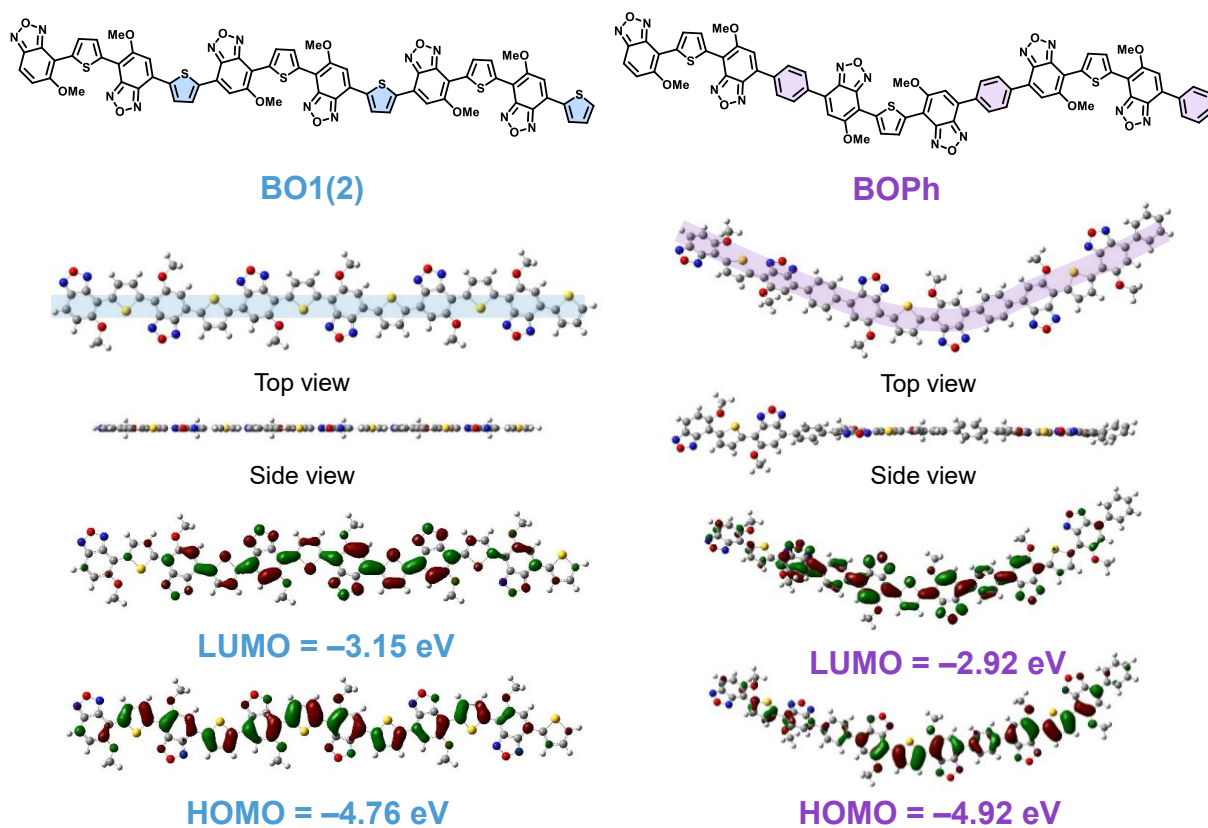

**Figure S53.** DFT (B3LYP/6-31G) calculation results of three repeating units of BO1(or BO2) and BOPh. The alkyl chains were replaced by methyl for simplicity.

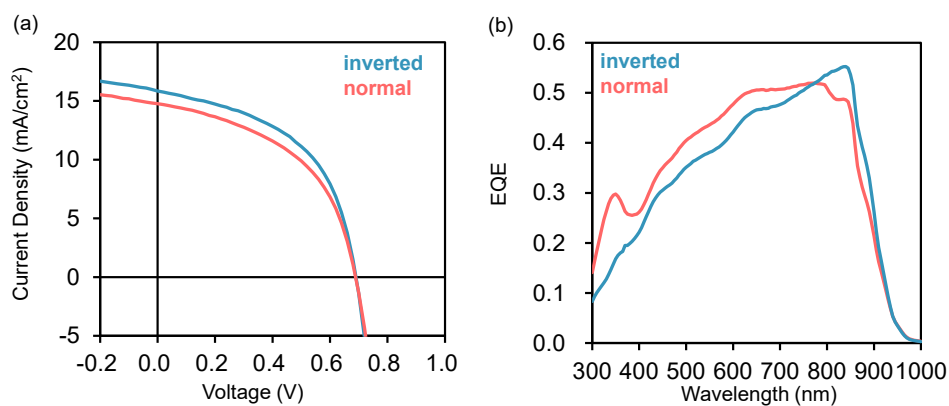

**Figure S54.** (a)  $JV$  curves and (b) EQE spectra of normal (red, ITO/PEDOT:PSS/BHJ/PDINO/Ag) and inverted (blue, ITO/ZnO/BHJ/MoOx/Ag) structures of BO2:Y6 (1:1.5).

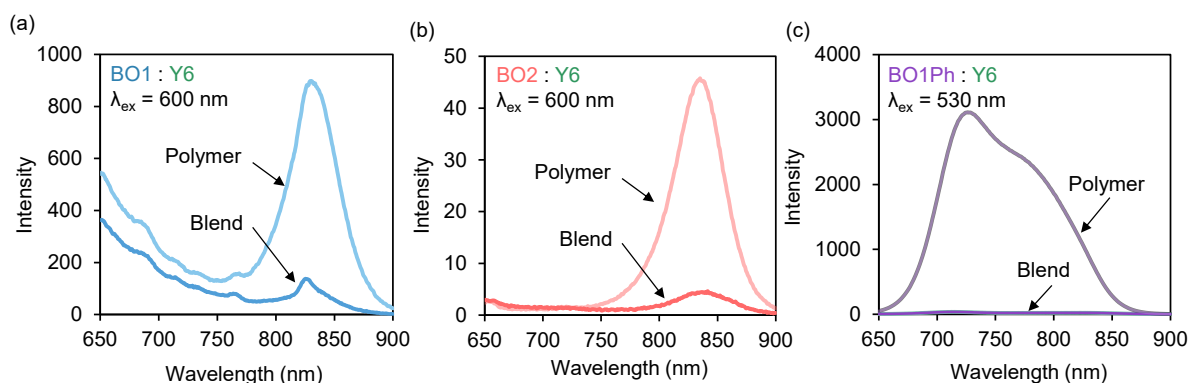

**Figure S55.** PL quench of each polymer (bright line) and BHJ with Y6 (dark line) for (a) BO1, (b) BO2, and (c) BO1Ph. The excitation wavelength is 600 nm for BO1 and BO2, and 530 nm for BO1Ph, at which mostly polymer is excited.

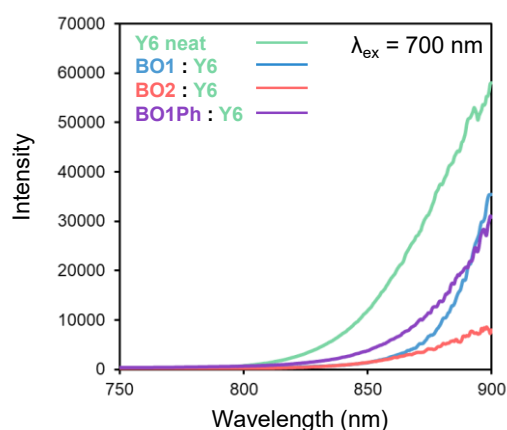

**Figure S56.** PL quench of BHJ (BO1:Y6, BO2:Y6, and BO1Ph:Y6) and Y6 pristine films excited at 700 nm. Note that 700 nm is not a perfect selective excitation of Y6. The sensitivity at each wavelength is calibrated.

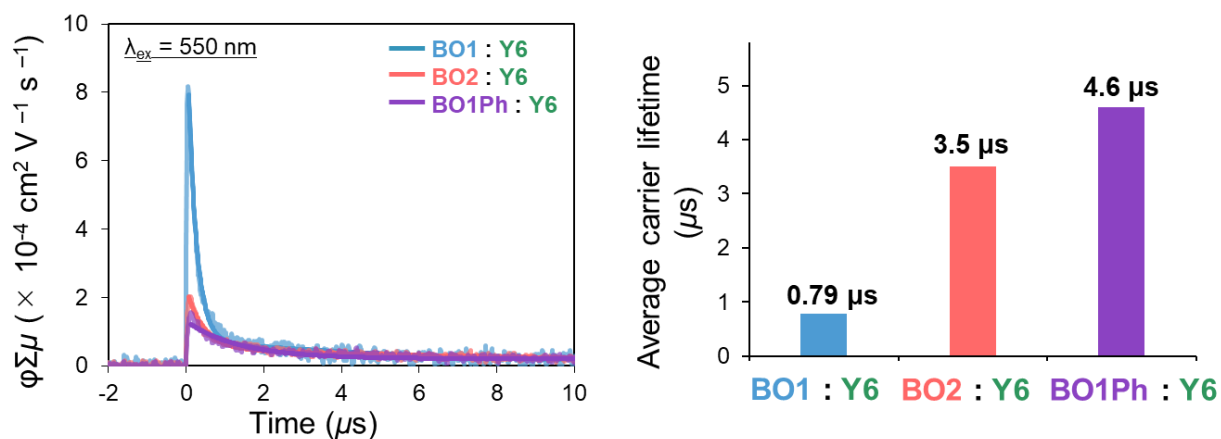

**Figure S57.** TRMC signal and average carrier lifetime of each BHJ (ex 550 nm,  $7.1 \times 10^{15}$  photons  $\text{cm}^{-2}$  pulse $^{-1}$ ).

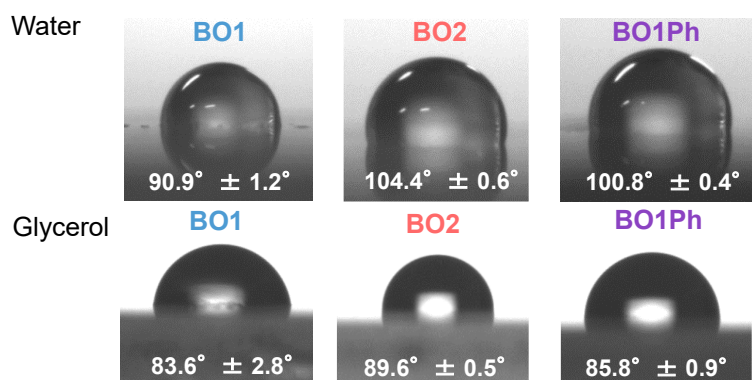

**Figure S58.** Contact angle (CA) measurements of pristine polymer film using water and glycerol droplets. The CAs of Y6 pristine film was 106.8° for water and 94.9° for glycerol, respectively (K. Kranthiraja, A. Saeki, *ACS Appl. Mater. Interfaces* **2022**, 14, 28936).

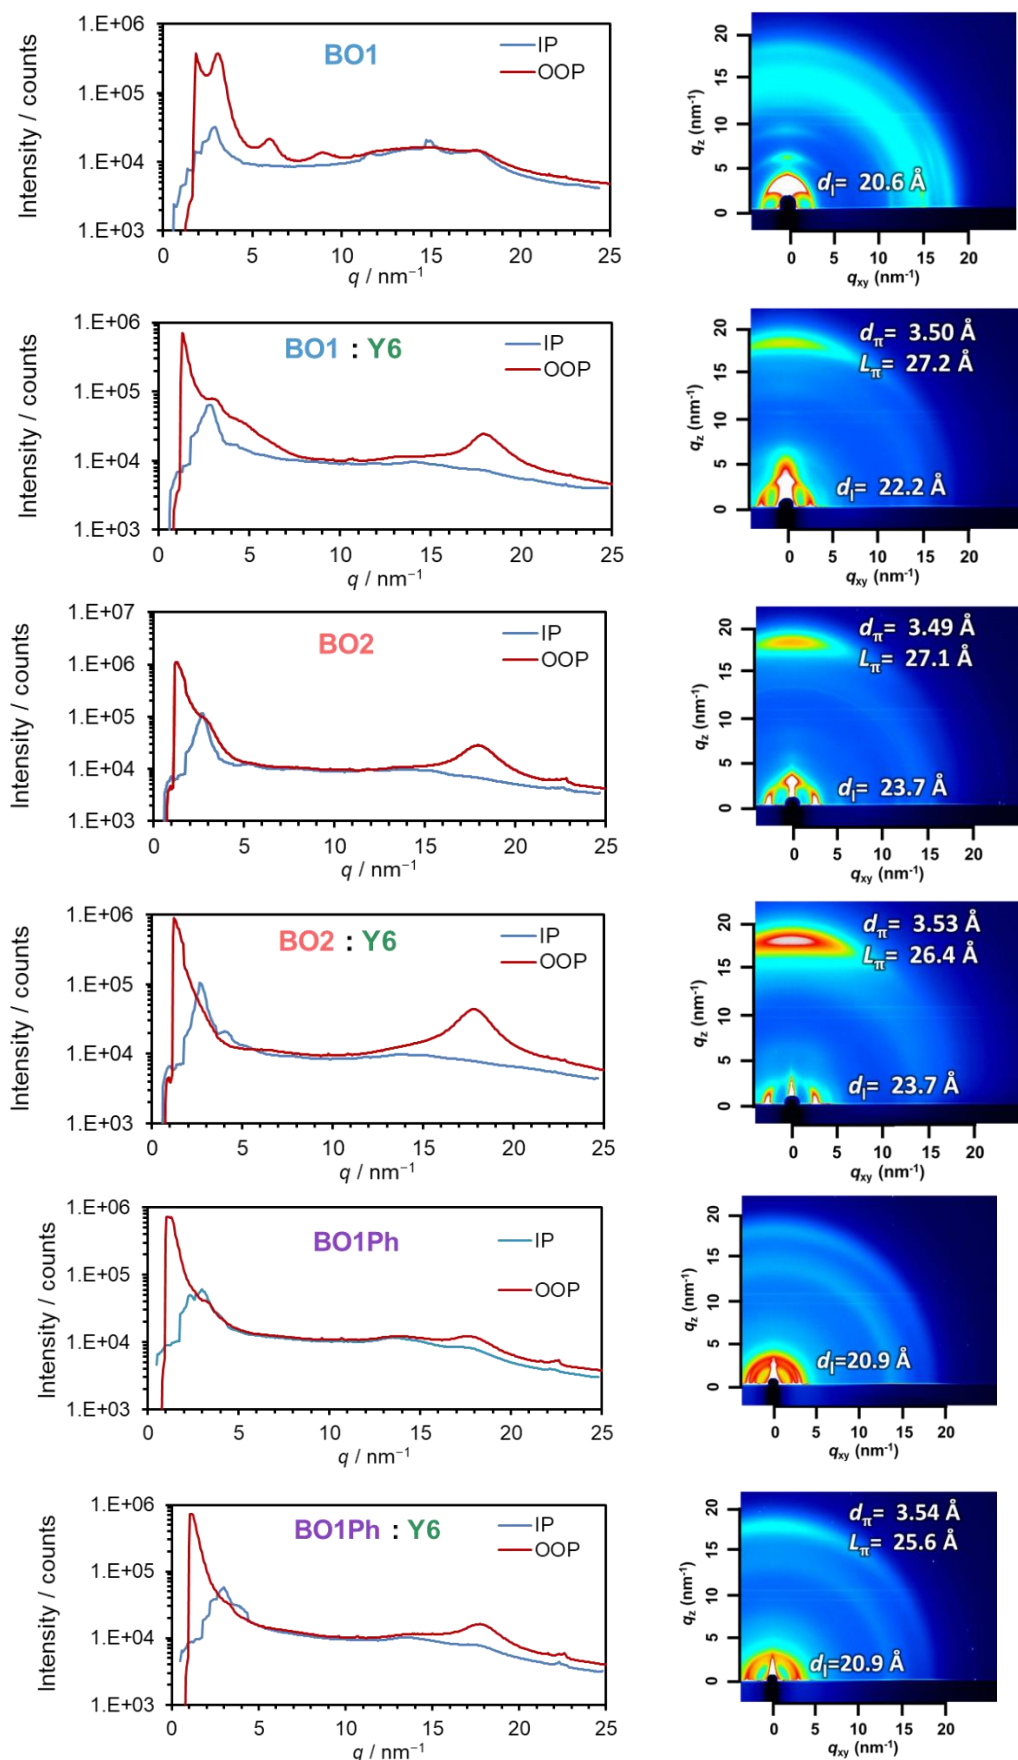

**Figure S59.** 1D profiles and 2D diffraction images of each polymer and BHJ. IP: in-plane, OOP: out-of-plane direction.



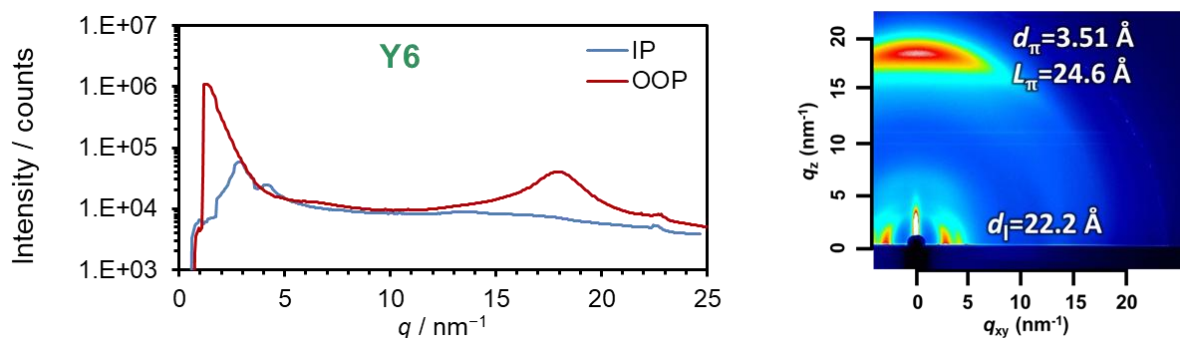

**Figure S60.** 1D profile and 2D diffraction image of Y6 pristine film. IP: in-plane, OOP: out-of-plane direction.

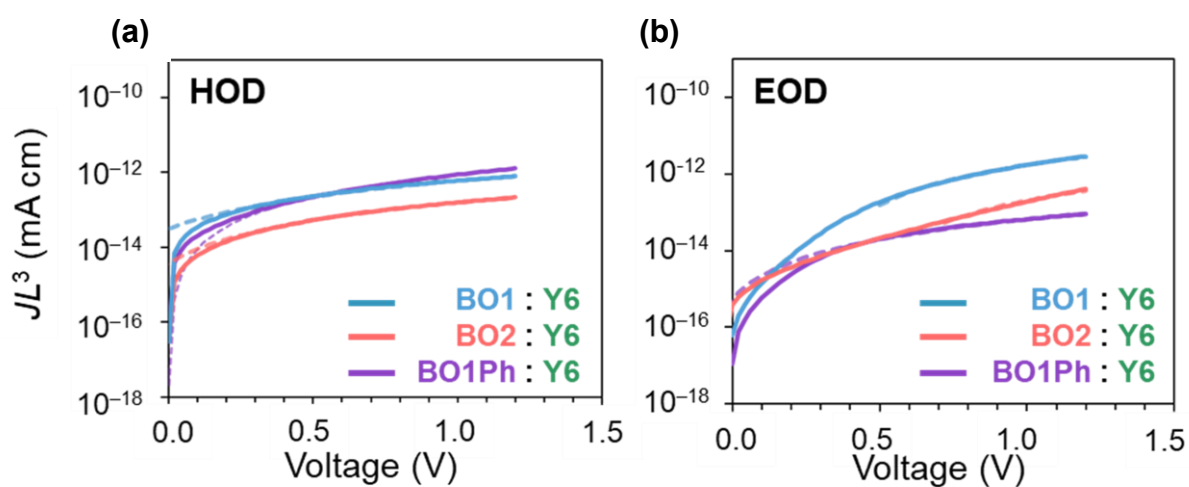

**Figure S61.**  $JL^3$  vs  $V$  curves of (a) hole-only and (b) electron-only devices.

| Monomer                                                                           | Number of Synthetic steps | Yield (%) | Purification steps |   |   |   |   | Hazardous chemicals |   |   |   |   |   |   |   |
|-----------------------------------------------------------------------------------|---------------------------|-----------|--------------------|---|---|---|---|---------------------|---|---|---|---|---|---|---|
|                                                                                   |                           |           | ①                  | ② | ③ | ④ | ⑤ | a                   | b | c | d | e | f | g | h |
| 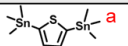 | 1                         | 81        | 1                  | 1 | 0 | 1 | 0 | 4                   |   |   |   |   |   |   |   |
| M1                                                                                | 6                         | 6.3       | 2                  | 4 | 5 | 0 | 0 | 33                  |   |   |   |   |   |   |   |

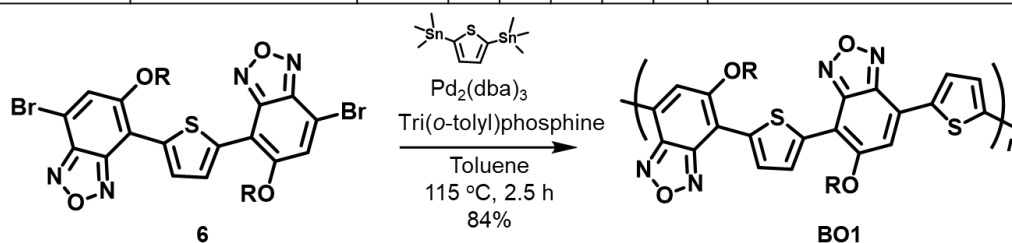

$$RY_{\text{polymer}}: 1/(0.81 \times 0.84) + 1/(0.063 \times 0.84) \quad NHC_{\text{polymer}} = 4 + 33 + 5 = 42$$

$$= 1.4697 + 18.896 = 20.4$$

| Absolute values |      |     |     |     | Relative Value <sup>b</sup> |         |      |      |      | SC   |
|-----------------|------|-----|-----|-----|-----------------------------|---------|------|------|------|------|
| NSS             | RY   | NUO | NCC | NHC | NSS                         | RY(log) | NUO  | NCC  | NHC  |      |
| 8               | 20.4 | 10  | 5   | 42  | 0.36                        | 0.68    | 0.26 | 0.38 | 0.95 | 48.7 |

<sup>b</sup>) Values used for the normalization:  $NSS_{\text{max}} = 22$ ;  $RY_{\text{max}} = 86.9$ ;  $NUO_{\text{max}} = 39$ ;  $NCC_{\text{max}} = 13$ ;  $NHC_{\text{max}} = 44$ .

**Figure S62.** Calculation log of SC value of BO1. The number of synthetic steps (NSS), the reciprocal yields of the monomers (RY), the number of unit operations required for the isolation/purification of the monomers (NUO), the number of column chromatographic purifications required by the monomers (NCC), and the number of hazardous chemicals used for their preparation (NHC).<sup>[S1]</sup>

| Monomer                                                                           | Number of Synthetic steps | Yield (%) | Purification steps |   |   |   |   | Hazardous chemicals |   |   |   |   |   |   |   |
|-----------------------------------------------------------------------------------|---------------------------|-----------|--------------------|---|---|---|---|---------------------|---|---|---|---|---|---|---|
|                                                                                   |                           |           | ①                  | ② | ③ | ④ | ⑤ | a                   | b | c | d | e | f | g | h |
| 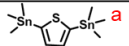 | 1                         | 81        | 1                  | 1 | 0 | 1 | 0 | 4                   |   |   |   |   |   |   |   |
| M2                                                                                | 6                         | 5.3       | 2                  | 4 | 5 | 0 | 0 | 33                  |   |   |   |   |   |   |   |

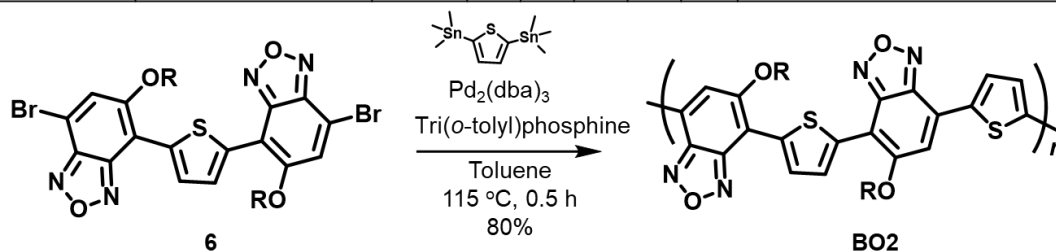

$$RY_{\text{polymer}}: 1/(0.81 \times 0.80) + 1/(0.053 \times 0.80) \quad NHC_{\text{polymer}} = 4 + 33 + 5 = 42$$

$$= 1.5432 + 23.585 = 25.1$$

| Absolute values |      |     |     |     | Relative Value <sup>b</sup> |         |      |      |      | SC   |
|-----------------|------|-----|-----|-----|-----------------------------|---------|------|------|------|------|
| NSS             | RY   | NUO | NCC | NHC | NSS                         | RY(log) | NUO  | NCC  | NHC  |      |
| 8               | 25.1 | 10  | 5   | 42  | 0.36                        | 0.72    | 0.26 | 0.38 | 0.95 | 49.7 |

<sup>a)</sup> Values used for the normalization:  $NSS_{\text{max}} = 22$ ;  $RY_{\text{max}} = 86.9$ ;  $NUO_{\text{max}} = 39$ ;  $NCC_{\text{max}} = 13$ ;  $NHC_{\text{max}} = 44$ .

**Figure S63.** Calculation log of SC value of BO2. The number of synthetic steps (NSS), the reciprocal yields of the monomers (RY), the number of unit operations required for the isolation/purification of the monomers (NUO), the number of column chromatographic purifications required by the monomers (NCC), and the number of hazardous chemicals used for their preparation (NHC).<sup>[S1]</sup>

Each parameters of monomer a) J. Xiao et al., *Adv. Mater.* **2021**, 33, 2008158

| Monomer                                                                           | Number of Synthetic steps | Yield (%) | Purification steps |   |   |   |   | Hazardous chemicals |   |   |   |   |   |   |   |
|-----------------------------------------------------------------------------------|---------------------------|-----------|--------------------|---|---|---|---|---------------------|---|---|---|---|---|---|---|
|                                                                                   |                           |           | ①                  | ② | ③ | ④ | ⑤ | a                   | b | c | d | e | f | g | h |
| 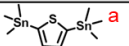 | 1                         | 81        | 1                  | 1 | 0 | 1 | 0 | 4                   |   |   |   |   |   |   |   |
| M1                                                                                | 6                         | 6.3       | 2                  | 4 | 5 | 0 | 0 | 33                  |   |   |   |   |   |   |   |

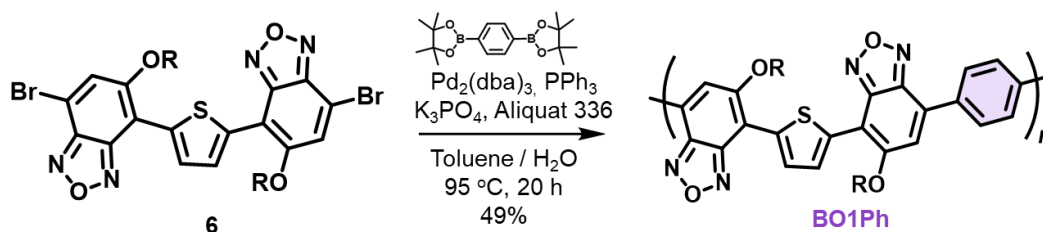

$$RY_{\text{polymer}}: 1/(0.81 \times 0.49) + 1/(0.063 \times 0.49) \quad NHC_{\text{polymer}} = 4 + 33 + 9 = 46$$

$$= 2.5195 + 32.394 = 34.9$$

| Absolute values |      |     |     |     | Relative Value <sup>b</sup> |         |      |      |      | SC   |
|-----------------|------|-----|-----|-----|-----------------------------|---------|------|------|------|------|
| NSS             | RY   | NUO | NCC | NHC | NSS                         | RY(log) | NUO  | NCC  | NHC  |      |
| 8               | 34.9 | 10  | 5   | 46  | 0.36                        | 0.80    | 0.26 | 0.38 | 1.05 | 52.7 |

b) Values used for the normalization:  $NSS_{\text{max}} = 22$ ;  $RY_{\text{max}} = 86.9$ ;  $NUO_{\text{max}} = 39$ ;  $NCC_{\text{max}} = 13$ ;  $NHC_{\text{max}} = 44$ .

**Figure S64.** Calculation log of SC value of BO1Ph. The number of synthetic steps (NSS), the reciprocal yields of the monomers (RY), the number of unit operations required for the isolation/purification of the monomers (NUO), the number of column chromatographic purifications required by the monomers (NCC), and the number of hazardous chemicals used for their preparation (NHC).<sup>[S1]</sup>

## 5. Supporting References

[S1] R. Po, G. Bianchi, C. Carbonera and A. Pellegrino, *Macromolecules*, 2015, **48**, 453–461.
